# Supplementary material for: Nine new compounds from the root bark of Lycium chinense and their α-glucosidase inhibitory activity
Source: Royal Society of Chemistry journal article supplement (doi:10.1039/c6ra24751b), 2017-01-01
Supplement: c6ra24751b1.pdf [file c6ra24751b1.pdf]

# Nine New Compounds from the Root Bark of

## *Lycium chinense* and the $\alpha$ -glucosidase

### Inhibitory Activity

Ya-Nan Yang,<sup>a‡</sup> Ya-Wen An,<sup>a‡</sup> Zhi-Lai Zhan,<sup>b</sup> Jing Xie,<sup>a</sup> Jian-Shuang Jiang,<sup>a</sup> Zi-Ming  
Feng,<sup>a</sup> Fei Ye,<sup>a</sup> and Pei-Cheng Zhang<sup>a\*</sup>

<sup>a</sup>State Key Laboratory of Bioactive Substance and Function of Natural Medicines,  
Institute of Materia Medica, Chinese Academy of Medical Sciences and Peking Union  
Medical College, Beijing 100050, People's Republic of China

<sup>b</sup>State Key Laboratory Breeding Base of Dao-di Herbs, National Resource Center for  
Chinese Materia Medica, China Academy of Chinese Medical Sciences, Beijing, 100700,  
People's Republic of China

## Supporting information

## The List of Contents

| No | Content                                                                                                 | Page |
|----|---------------------------------------------------------------------------------------------------------|------|
| 1  | <b>Figure S1.</b> Effect of the extract of <i>Lycium chinense</i> on oral sucrose tolerance ( $n = 6$ ) | S4   |
| 2  | <b>Figure S2.</b> The IR spectrum of compound <b>1*</b>                                                 | S5   |
| 3  | <b>Figure S3.</b> The UV spectrum of compound <b>1*</b>                                                 | S5   |
| 4  | <b>Figure S4.</b> The $^1\text{H}$ NMR spectrum of compound <b>1*</b> in $\text{DMSO-}d_6$              | S6   |
| 5  | <b>Figure S5.</b> The $^{13}\text{C}$ NMR spectrum of compound <b>1*</b> in $\text{DMSO-}d_6$           | S6   |
| 6  | <b>Figure S6.</b> The HSQC spectrum of compound <b>1*</b> in $\text{DMSO-}d_6$                          | S7   |
| 7  | <b>Figure S7.</b> The HMBC spectrum of compound <b>1*</b> in $\text{DMSO-}d_6$                          | S7   |
| 8  | <b>Figure S8.</b> The CD spectrum of <b>1*</b> in MeOH                                                  | S8   |
| 9  | <b>Figure S9.</b> The HRESIMS of compound <b>1*</b>                                                     | S8   |
| 10 | <b>Figure S10.</b> The IR spectrum of compound <b>2*</b>                                                | S9   |
| 11 | <b>Figure S11.</b> The UV spectrum of compound <b>2*</b>                                                | S9   |
| 12 | <b>Figure S12.</b> The $^1\text{H}$ NMR spectrum of compound <b>2*</b> in $\text{DMSO-}d_6$             | S10  |
| 13 | <b>Figure S13.</b> The $^{13}\text{C}$ NMR spectrum of compound <b>2*</b> in $\text{DMSO-}d_6$          | S10  |
| 14 | <b>Figure S14.</b> The HSQC spectrum of compound <b>2*</b> in $\text{DMSO-}d_6$                         | S11  |
| 15 | <b>Figure S15.</b> The HMBC spectrum of compound <b>2*</b> in $\text{DMSO-}d_6$                         | S11  |
| 16 | <b>Figure S16.</b> The HRESIMS of compound <b>2*</b>                                                    | S12  |
| 17 | <b>Figure S17.</b> The IR spectrum of compound <b>3*</b>                                                | S12  |
| 18 | <b>Figure S18.</b> The UV spectrum of compound <b>3*</b>                                                | S13  |
| 19 | <b>Figure S19.</b> The $^1\text{H}$ NMR spectrum of compound <b>3*</b> in $\text{DMSO-}d_6$             | S13  |
| 20 | <b>Figure S20.</b> The $^{13}\text{C}$ NMR spectrum of compound <b>3*</b> in $\text{DMSO-}d_6$          | S14  |
| 21 | <b>Figure S21.</b> The HSQC spectrum of compound <b>3*</b> in $\text{DMSO-}d_6$                         | S14  |
| 22 | <b>Figure S22.</b> The HMBC spectrum of compound <b>3*</b> in $\text{DMSO-}d_6$                         | S15  |
| 23 | <b>Figure S23.</b> The CD spectrum of <b>3*</b> in MeOH                                                 | S15  |
| 24 | <b>Figure S24.</b> The HRESIMS of compound <b>3*</b>                                                    | S16  |

---

|    |                                                                                                |     |
|----|------------------------------------------------------------------------------------------------|-----|
| 25 | <b>Figure S25.</b> The IR spectrum of compound <b>4*</b>                                       | S16 |
| 26 | <b>Figure S26.</b> The UV spectrum of compound <b>4*</b>                                       | S17 |
| 27 | <b>Figure S27.</b> The $^1\text{H}$ NMR spectrum of compound <b>4*</b> in $\text{DMSO-}d_6$    | S17 |
| 28 | <b>Figure S28.</b> The $^{13}\text{C}$ NMR spectrum of compound <b>4*</b> in $\text{DMSO-}d_6$ | S18 |
| 29 | <b>Figure S29.</b> The HSQC spectrum of compound <b>4*</b> in $\text{DMSO-}d_6$                | S18 |
| 30 | <b>Figure S30.</b> The HMBC spectrum of compound <b>4*</b> in $\text{DMSO-}d_6$                | S19 |
| 31 | <b>Figure S31.</b> The CD spectrum of <b>4*</b> in MeOH                                        | S19 |
| 32 | <b>Figure S32.</b> The HRESIMS of compound <b>4*</b>                                           | S20 |
| 33 | <b>Figure S33.</b> The $^1\text{H}$ NMR spectrum of compound <b>4a</b> in $\text{CDCl}_3$      | S20 |
| 34 | <b>Figure S34.</b> The IR spectrum of compound <b>5*</b>                                       | S21 |
| 35 | <b>Figure S35.</b> The UV spectrum of compound <b>5*</b>                                       | S21 |
| 36 | <b>Figure S36.</b> The $^1\text{H}$ NMR spectrum of compound <b>5*</b> in $\text{DMSO-}d_6$    | S22 |
| 37 | <b>Figure S37.</b> The $^{13}\text{C}$ NMR spectrum of compound <b>5*</b> in $\text{DMSO-}d_6$ | S22 |
| 38 | <b>Figure S38.</b> The HSQC spectrum of compound <b>5*</b> in $\text{DMSO-}d_6$                | S23 |
| 39 | <b>Figure S39.</b> The HMBC spectrum of compound <b>5*</b> in $\text{DMSO-}d_6$                | S23 |
| 40 | <b>Figure S40.</b> The CD spectrum of <b>5*</b> in MeOH                                        | S24 |
| 41 | <b>Figure S41.</b> The HRESIMS of compound <b>5*</b>                                           | S24 |
| 42 | <b>Figure S42.</b> The $^1\text{H}$ NMR spectrum of compound <b>5a</b> in $\text{CDCl}_3$      | S25 |
| 43 | <b>Figure S43.</b> The IR spectrum of compound <b>6*</b>                                       | S25 |
| 44 | <b>Figure S44.</b> The UV spectrum of compound <b>6*</b>                                       | S26 |
| 45 | <b>Figure S45.</b> The $^1\text{H}$ NMR spectrum of compound <b>6*</b> in $\text{DMSO-}d_6$    | S26 |
| 46 | <b>Figure S46.</b> The $^{13}\text{C}$ NMR spectrum of compound <b>6*</b> in $\text{DMSO-}d_6$ | S27 |
| 47 | <b>Figure S47.</b> The HSQC spectrum of compound <b>6*</b> in $\text{DMSO-}d_6$                | S27 |
| 48 | <b>Figure S48.</b> The HMBC spectrum of compound <b>6*</b> in $\text{DMSO-}d_6$                | S28 |
| 49 | <b>Figure S49.</b> The CD spectrum of <b>6*</b> in MeOH                                        | S28 |
| 50 | <b>Figure S50.</b> The HRESIMS of compound <b>6*</b>                                           | S29 |

---

---

|    |                                                                                                |     |
|----|------------------------------------------------------------------------------------------------|-----|
| 51 | <b>Figure S51.</b> The $^1\text{H}$ NMR spectrum of compound <b>6a</b> in $\text{CDCl}_3$      | S29 |
| 52 | <b>Figure S52.</b> The IR spectrum of compound <b>7*</b>                                       | S30 |
| 53 | <b>Figure S53.</b> The UV spectrum of compound <b>7*</b>                                       | S30 |
| 54 | <b>Figure S54.</b> The $^1\text{H}$ NMR spectrum of compound <b>7*</b> in $\text{DMSO-}d_6$    | S31 |
| 55 | <b>Figure S55.</b> The $^{13}\text{C}$ NMR spectrum of compound <b>7*</b> in $\text{DMSO-}d_6$ | S31 |
| 56 | <b>Figure S56.</b> The HSQC spectrum of compound <b>7*</b> in $\text{DMSO-}d_6$                | S32 |
| 57 | <b>Figure S57.</b> The HMBC spectrum of compound <b>7*</b> in $\text{DMSO-}d_6$                | S32 |
| 58 | <b>Figure S58.</b> The HRESIMS of compound <b>7*</b>                                           | S33 |
| 59 | <b>Figure S59.</b> The IR spectrum of compound <b>8*</b>                                       | S33 |
| 60 | <b>Figure S60.</b> The UV spectrum of compound <b>8*</b>                                       | S34 |
| 61 | <b>Figure S61.</b> The $^1\text{H}$ NMR spectrum of compound <b>8*</b> in $\text{DMSO-}d_6$    | S34 |
| 62 | <b>Figure S62.</b> The $^{13}\text{C}$ NMR spectrum of compound <b>8*</b> in $\text{DMSO-}d_6$ | S35 |
| 63 | <b>Figure S63.</b> The HSQC spectrum of compound <b>8*</b> in $\text{DMSO-}d_6$                | S35 |
| 64 | <b>Figure S64.</b> The HMBC spectrum of compound <b>8*</b> in $\text{DMSO-}d_6$                | S36 |
| 65 | <b>Figure S65.</b> The HRESIMS of compound <b>8*</b>                                           | S36 |
| 59 | <b>Figure S66.</b> The IR spectrum of compound <b>9*</b>                                       | S37 |
| 60 | <b>Figure S67.</b> The UV spectrum of compound <b>9*</b>                                       | S37 |
| 61 | <b>Figure S68.</b> The $^1\text{H}$ NMR spectrum of compound <b>9*</b> in $\text{DMSO-}d_6$    | S38 |
| 62 | <b>Figure S69.</b> The $^{13}\text{C}$ NMR spectrum of compound <b>9*</b> in $\text{DMSO-}d_6$ | S38 |
| 63 | <b>Figure S70.</b> The HSQC spectrum of compound <b>9*</b> in $\text{DMSO-}d_6$                | S39 |
| 64 | <b>Figure S71.</b> The HMBC spectrum of compound <b>9*</b> in $\text{DMSO-}d_6$                | S39 |
| 65 | <b>Figure S72.</b> The HRESIMS of compound <b>9*</b>                                           | S40 |

---

## 1. Oral sucrose tolerance test (OSTT)

Blood samples of the ICR mice were collected from the tail vein after a fast of 12 h. Blood glucose levels were measured and defined as zero time. Then, the ICR mice were divided into five experimental groups: Control: normal rats administrated with purified water and sucrose (4 g/kg); acar1: normal rats administrated with sucrose (4 g/kg) and acarbose (10 mg/kg); C.L.: normal rats administrated with sucrose (4 g/kg) and *Lycium chinense* extract (1 g/kg); Fr. 1: normal rats administrated with sucrose (4 g/kg) and Fr. 1 (1 g/kg); Fr. 2: normal rats administrated with sucrose (4 g/kg) and Fr. 2 (1 g/kg). Blood glucose levels were measured at 30, 60, 120 min later. The areas under the curve (AUC) values were determined (Figure S1).

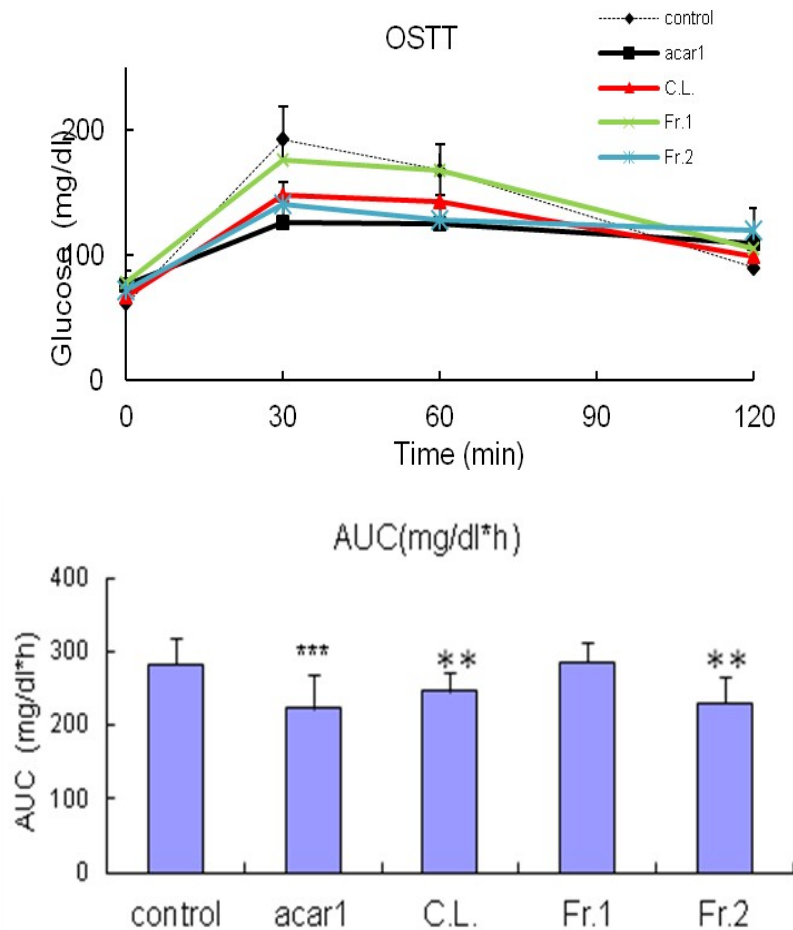

Figure S1. Effect of the extract of *Lycium chinense* on oral sucrose tolerance ( $n = 6$ ).

\* $P < 0.05$  compared with sucrose control group, \*\* $P < 0.01$  compared with sucrose control group.

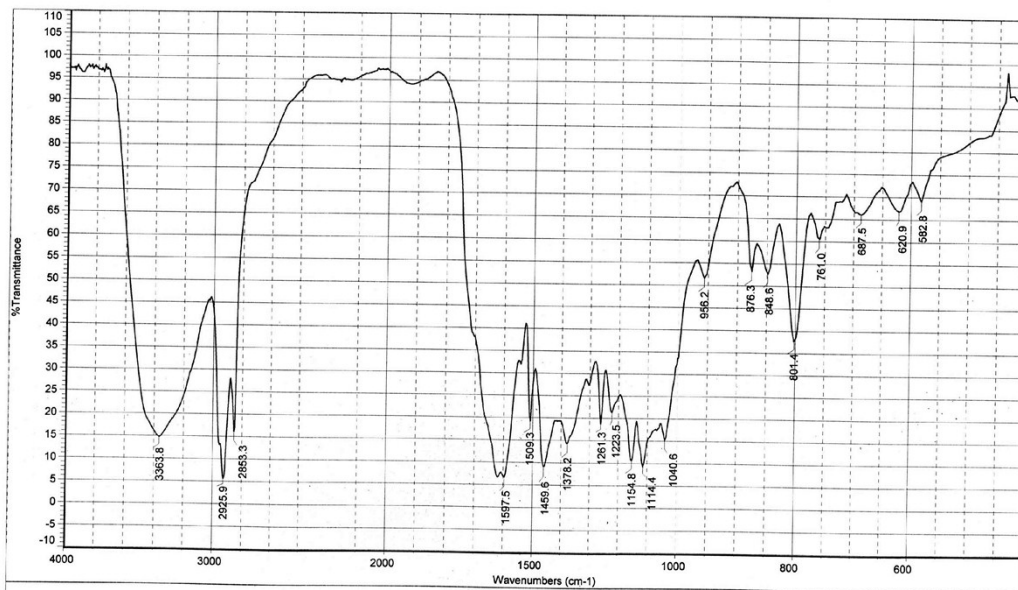

**Figure S2.** The IR spectrum of compound **1\***

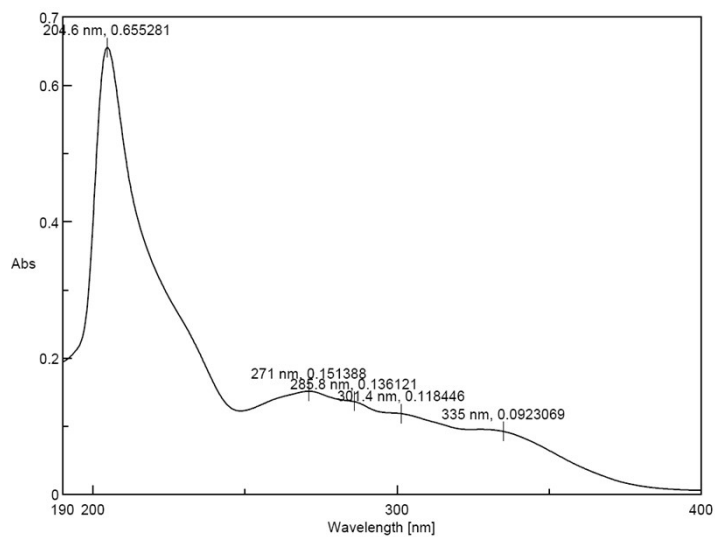

**Figure S3.** The UV spectrum of compound **1\***

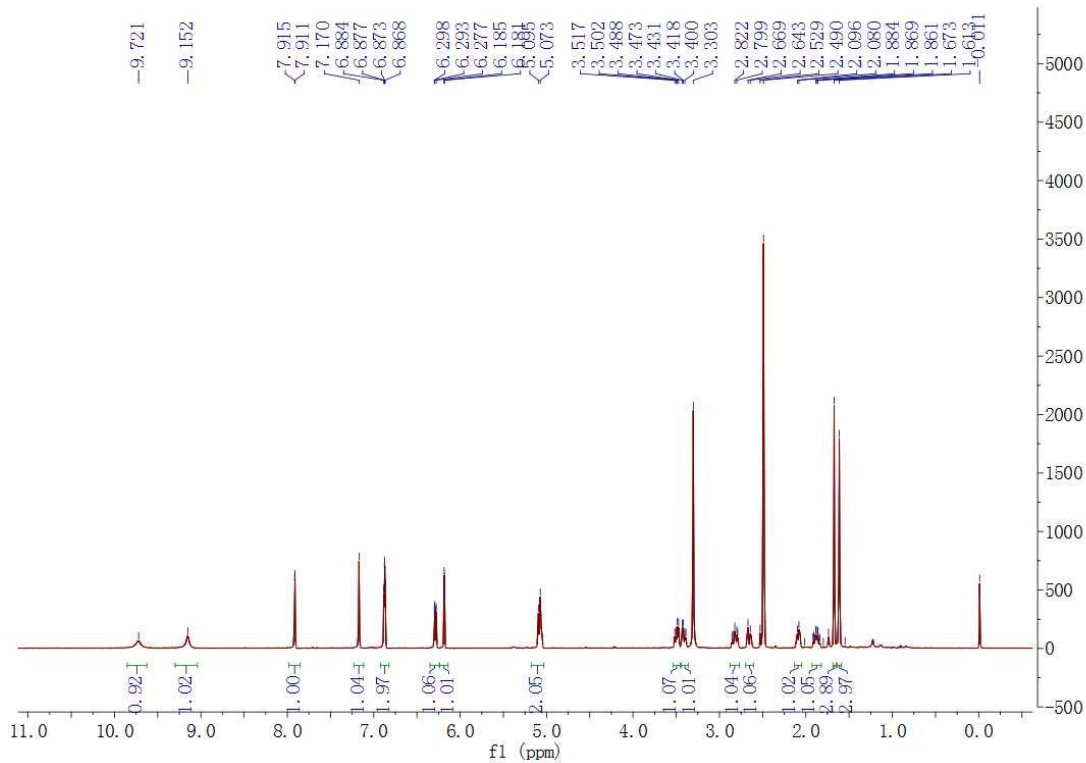

**Figure S4.** The  $^1\text{H}$  NMR spectrum of compound **1\*** in  $\text{DMSO-}d_6$

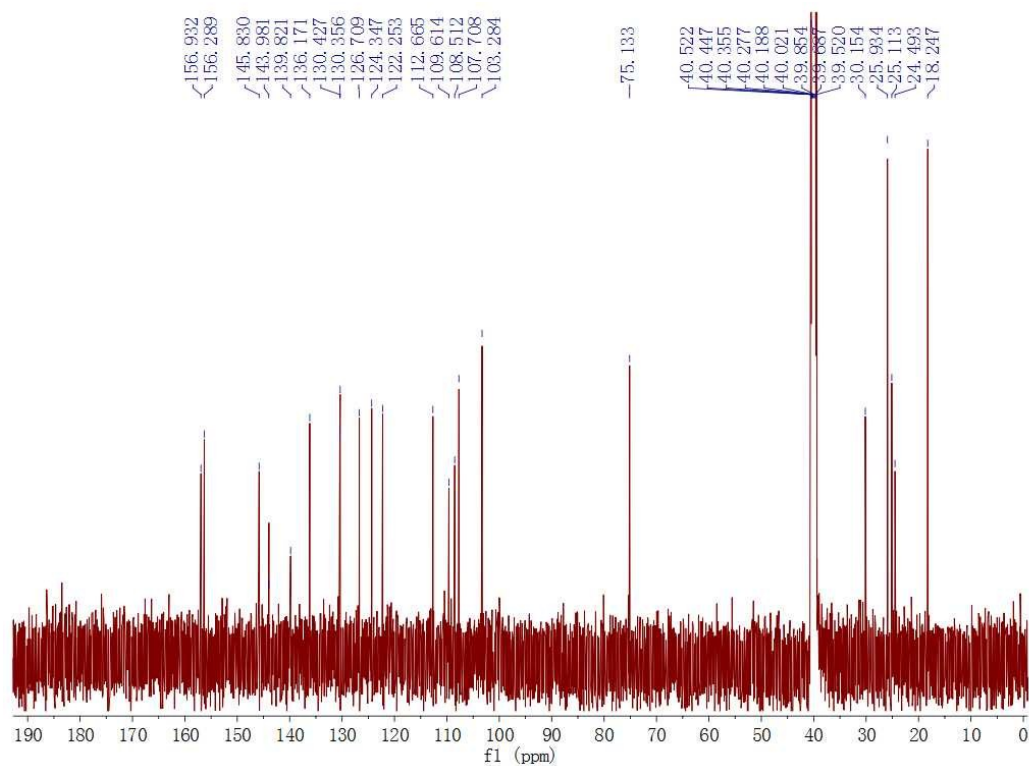

**Figure S5.** The  $^{13}\text{C}$  NMR spectrum of compound **1\*** in  $\text{DMSO-}d_6$

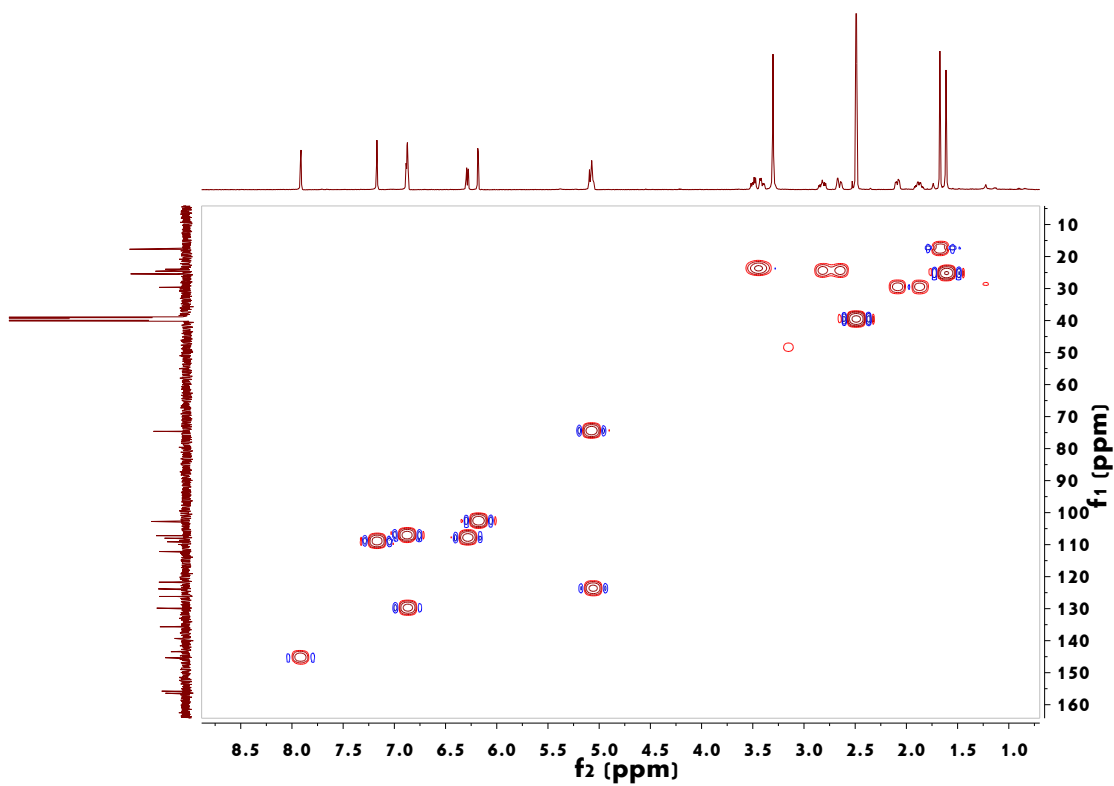

Figure S6. The HSQC spectrum of compound **1\*** in DMSO- $d_6$

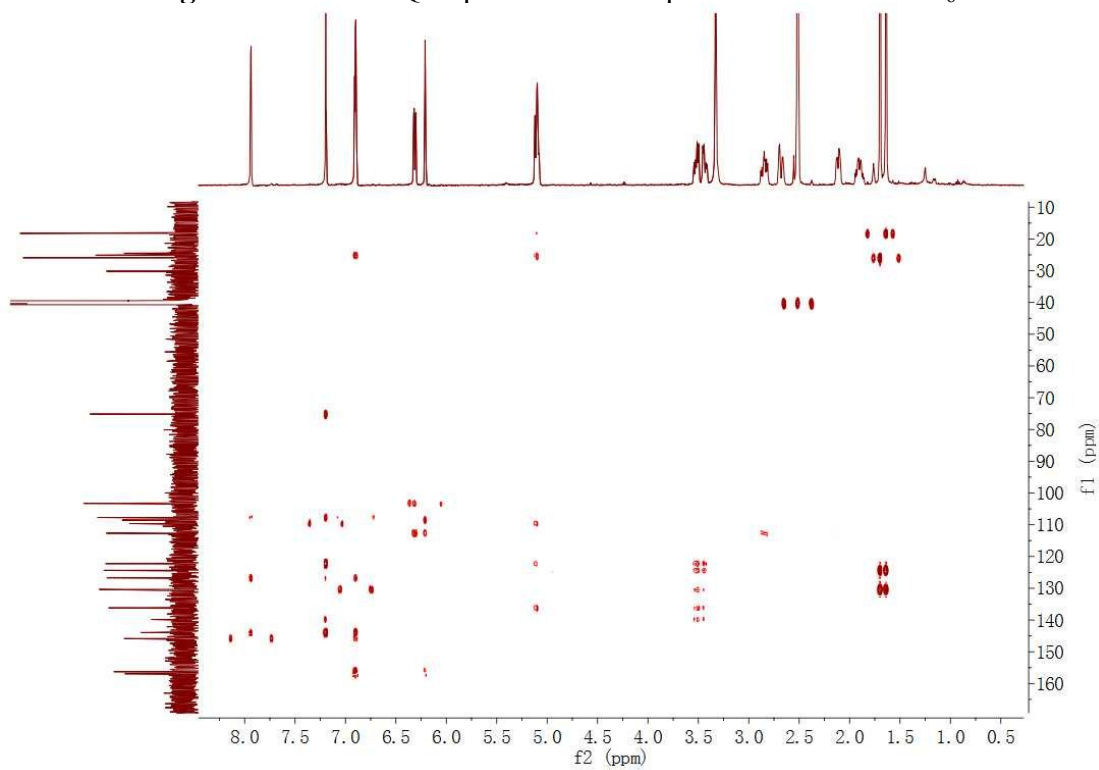

Figure S7. The HMBC spectrum of compound **1\*** in DMSO- $d_6$



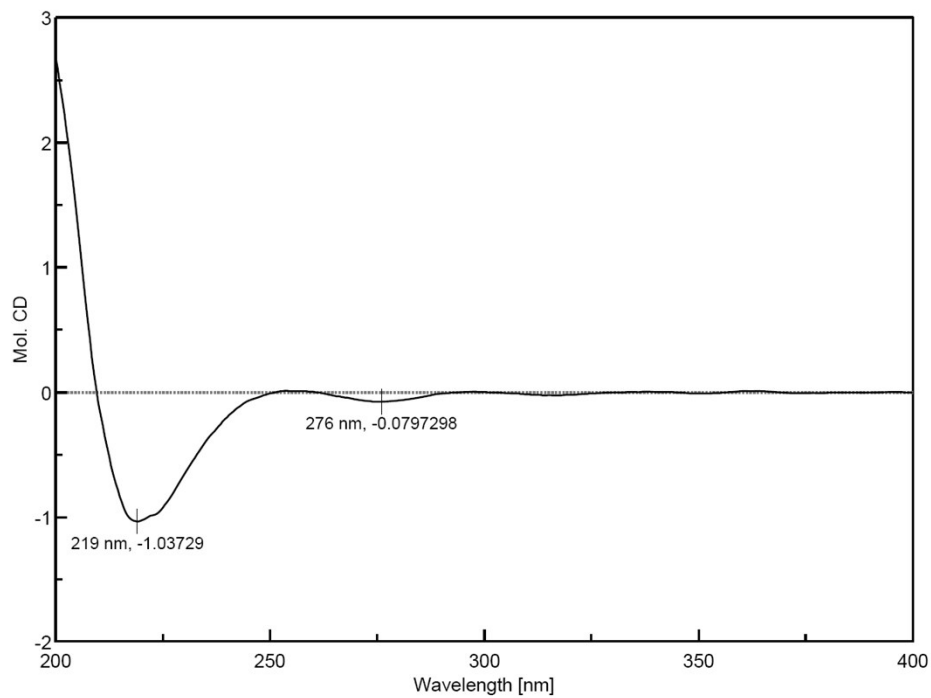

**Figure S8.** The CD spectrum of 1\* in MeOH

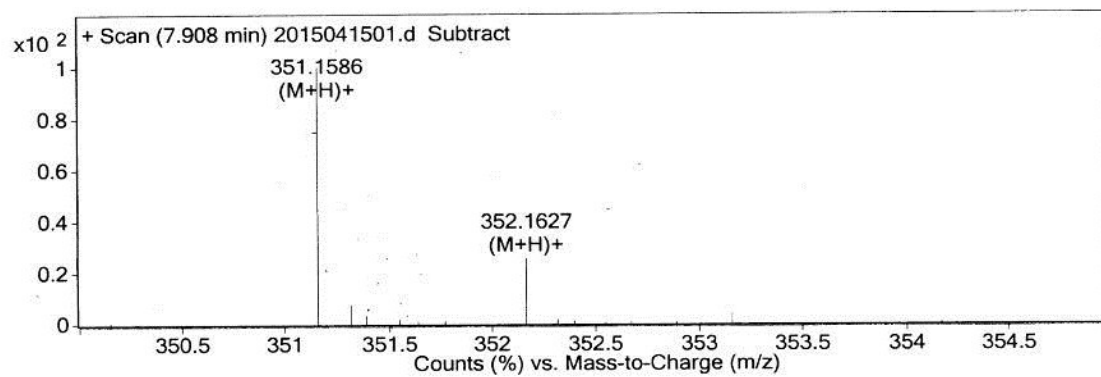

**Figure S9.** The HRESIMS of compound 1\*

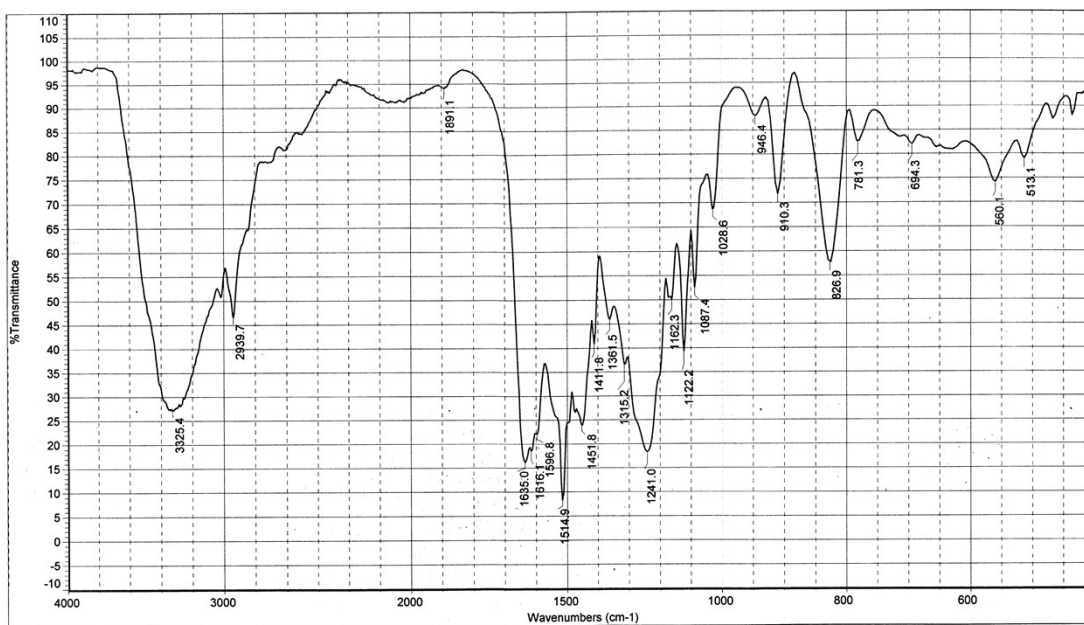

**Figure S10.** The IR spectrum of compound 2\*

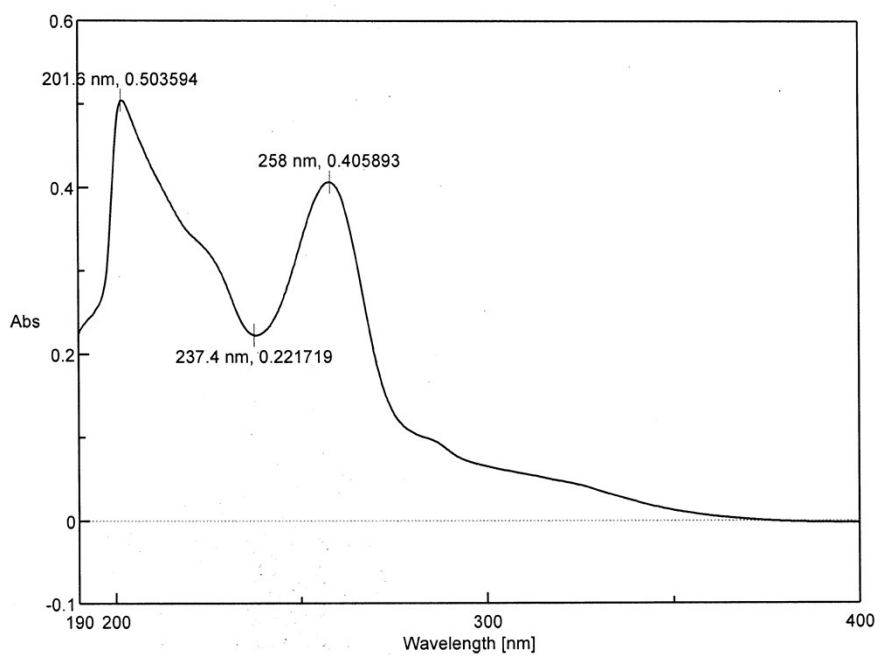

**Figure S11.** The UV spectrum of compound 2\*

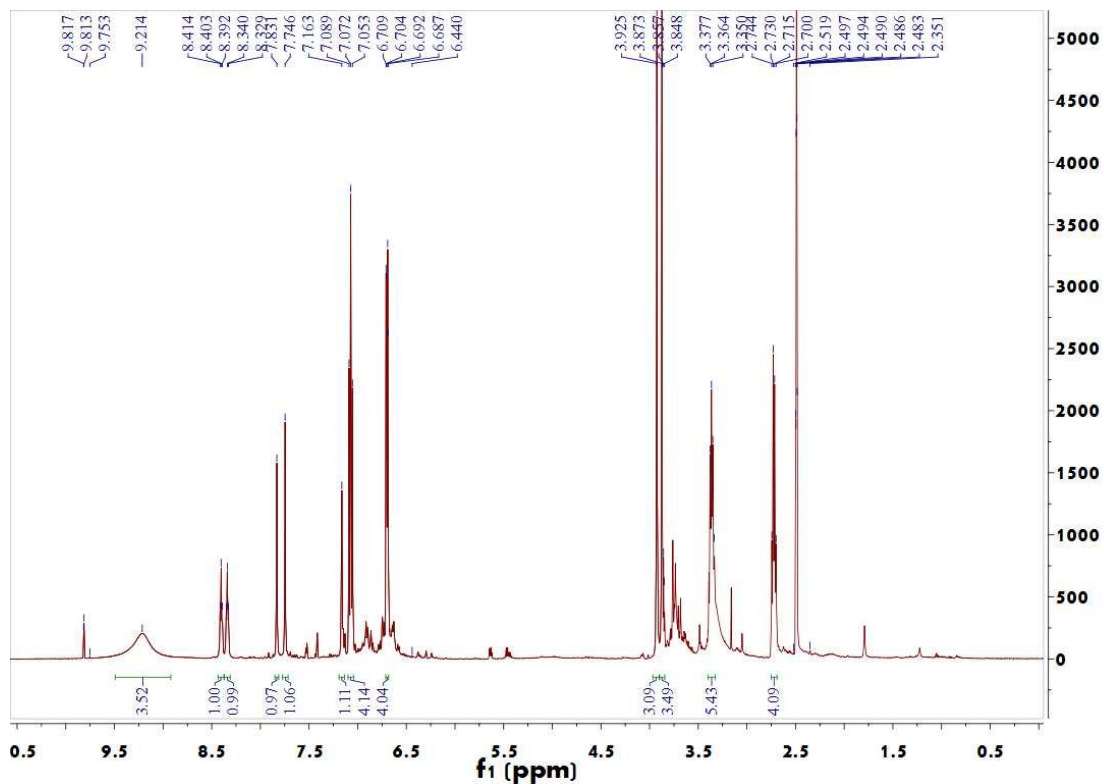

Figure S12. The  $^1\text{H}$  NMR spectrum of compound **2\*** in  $\text{DMSO-}d_6$

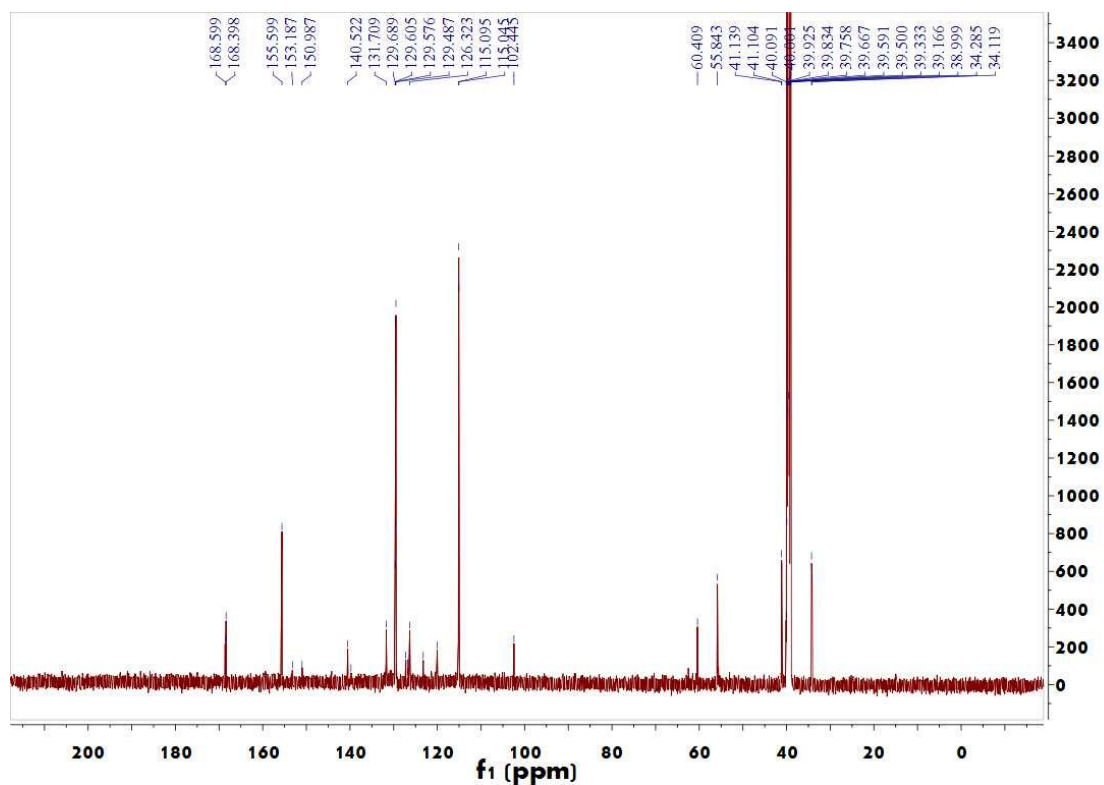

Figure S13. The  $^{13}\text{C}$  NMR spectrum of compound **2\*** in  $\text{DMSO-}d_6$

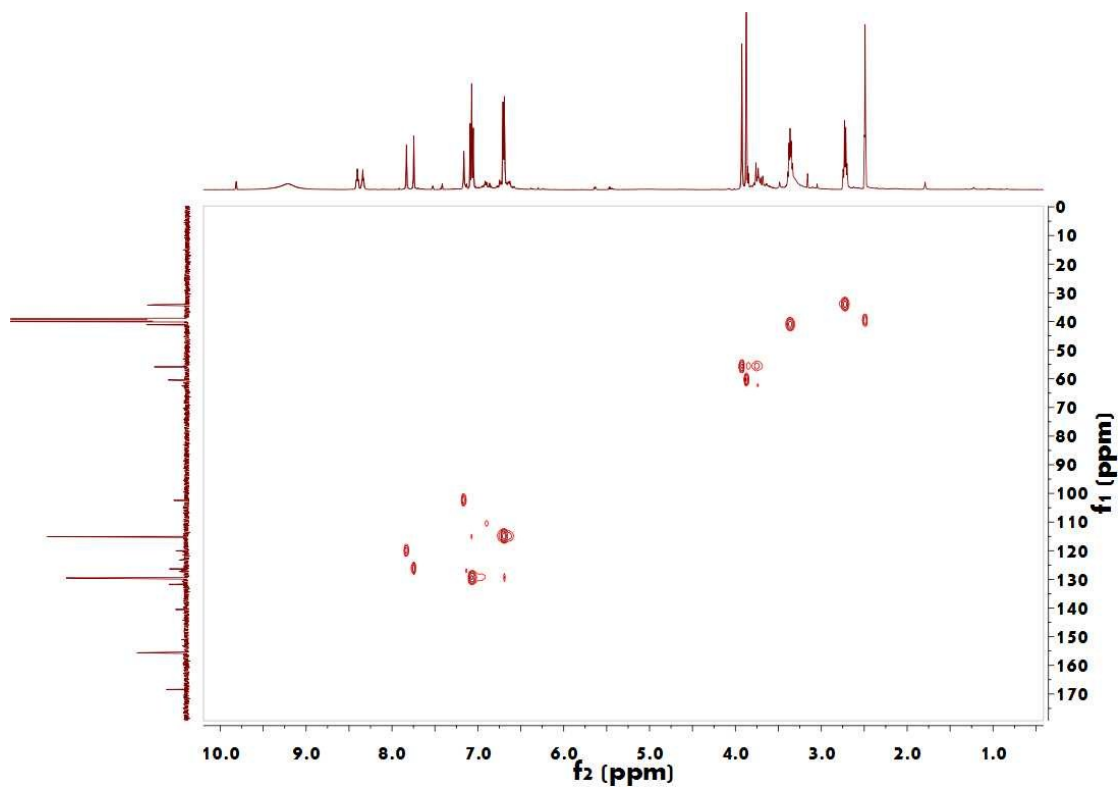

Figure S14. The HSQC spectrum of compound **2\*** in DMSO- $d_6$

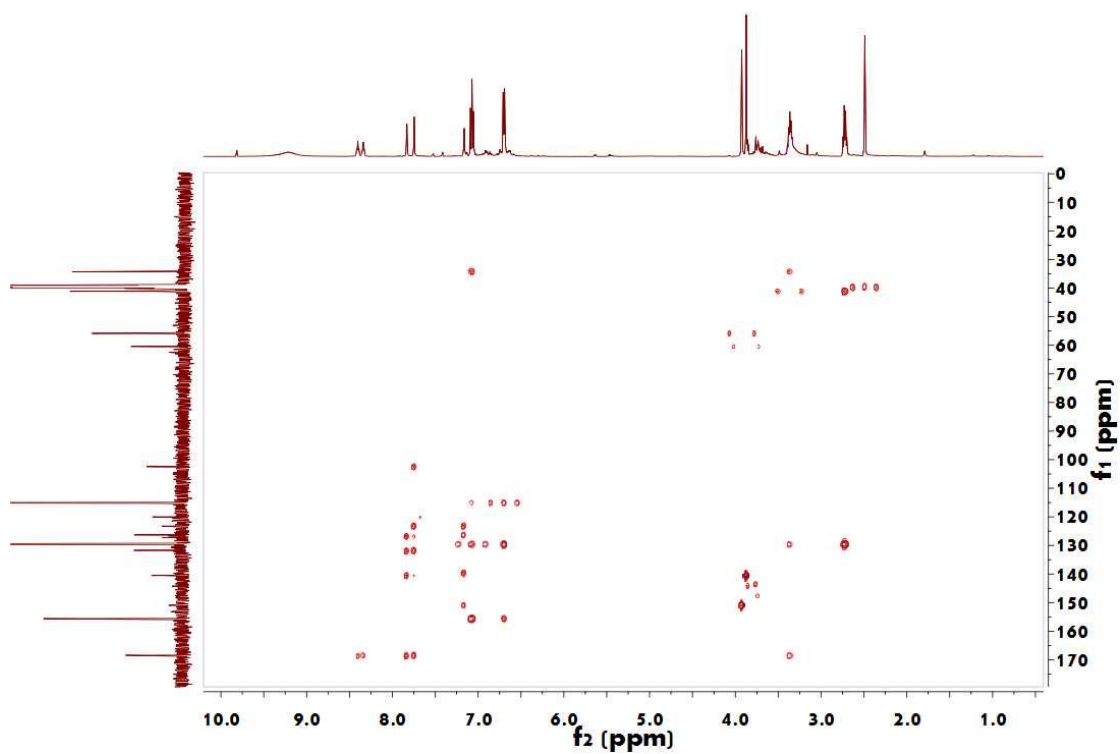

Figure S15. The HMBC spectrum of compound **2\*** in DMSO- $d_6$

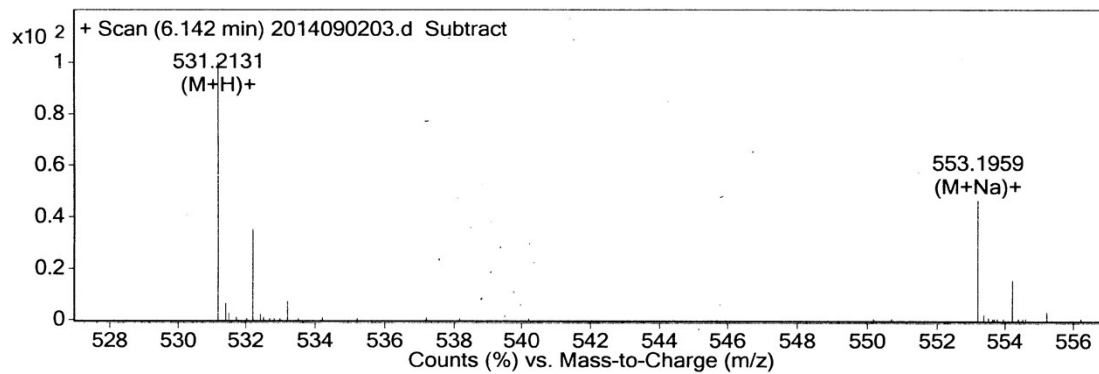

Figure S16. The HRESIMS of compound 2\*

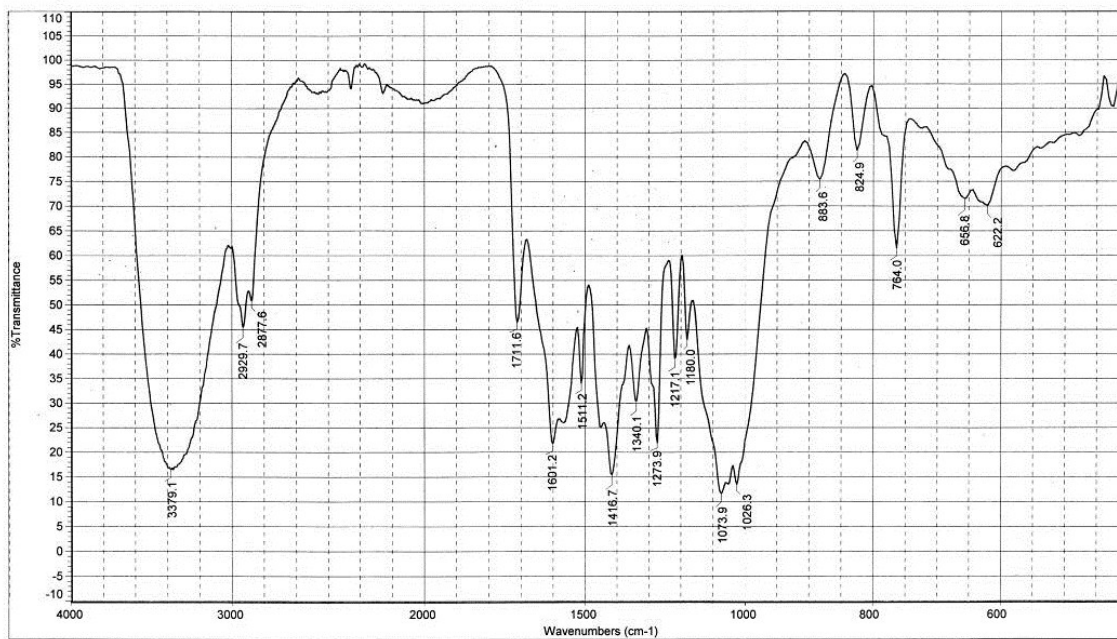

Figure S17. The IR spectrum of compound 3\*

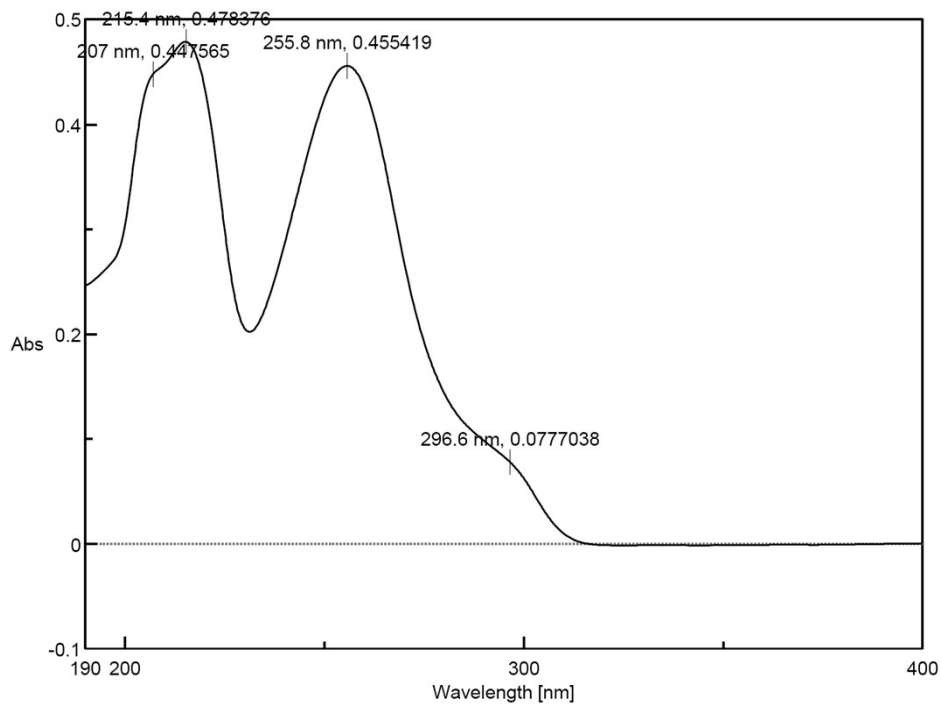

**Figure S18.** The UV spectrum of compound **3\***

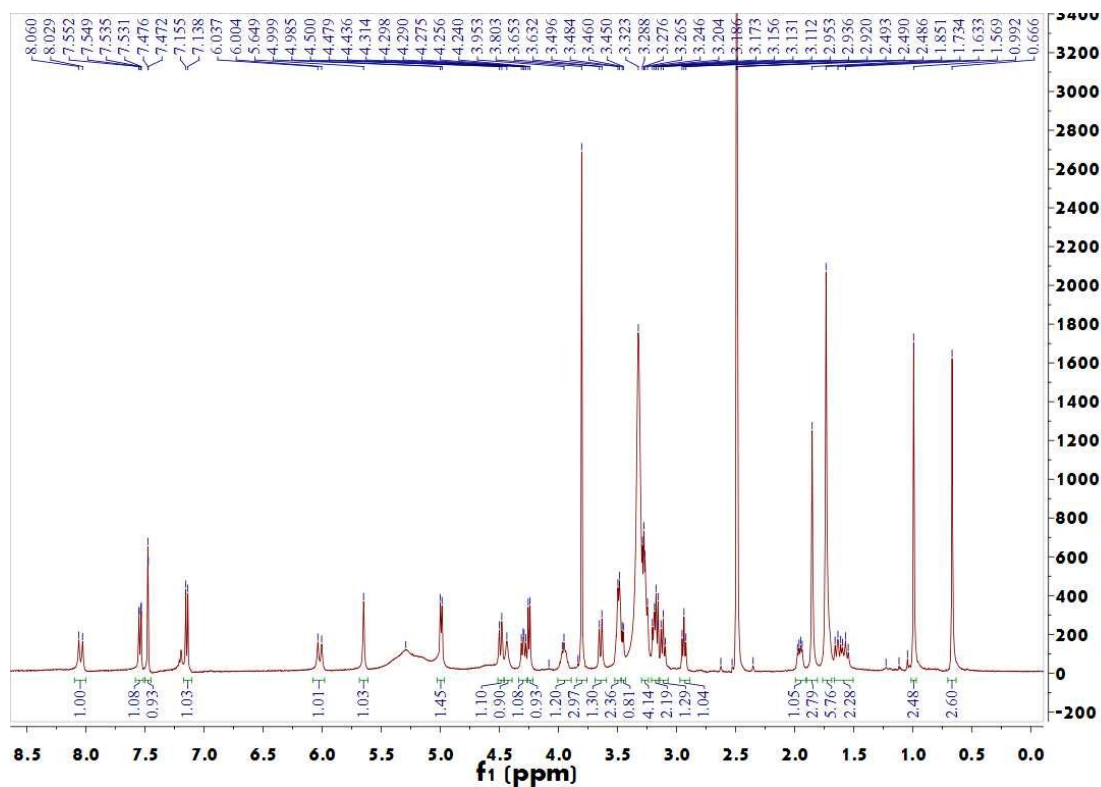

**Figure S19.** The  $^1\text{H}$  NMR spectrum of compound **3\*** in  $\text{DMSO-}d_6$

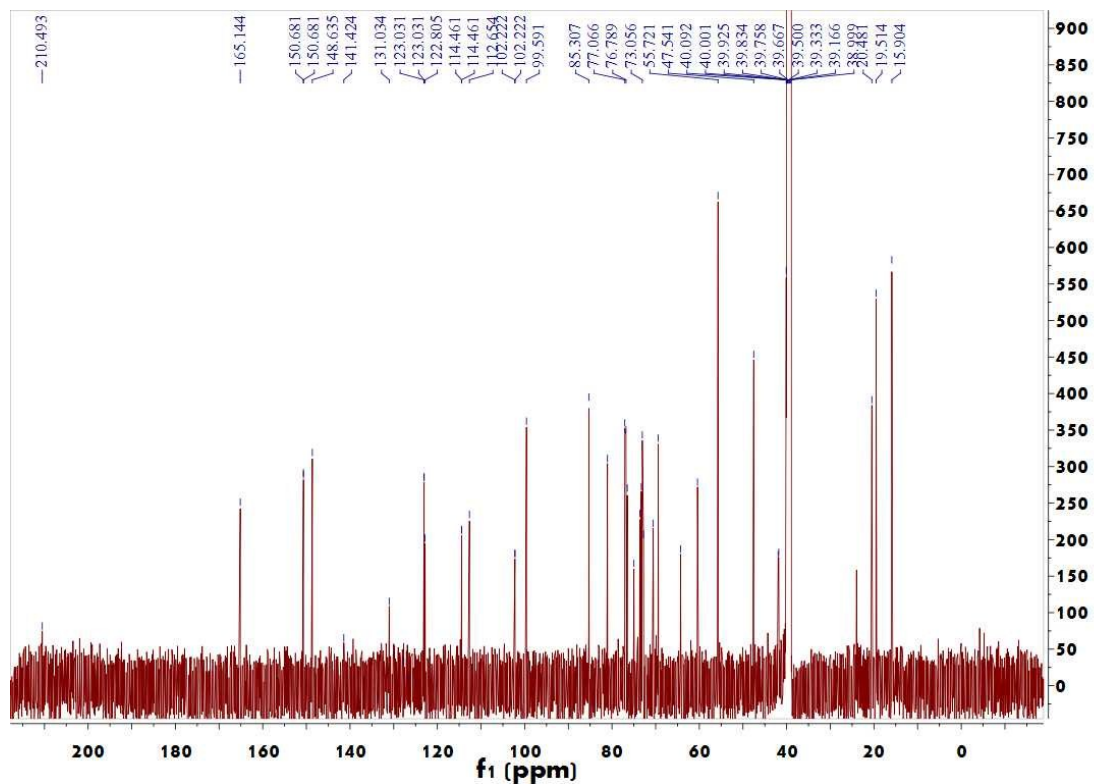

Figure S20. The  $^{13}\text{C}$  NMR spectrum of compound **3\*** in  $\text{DMSO-}d_6$

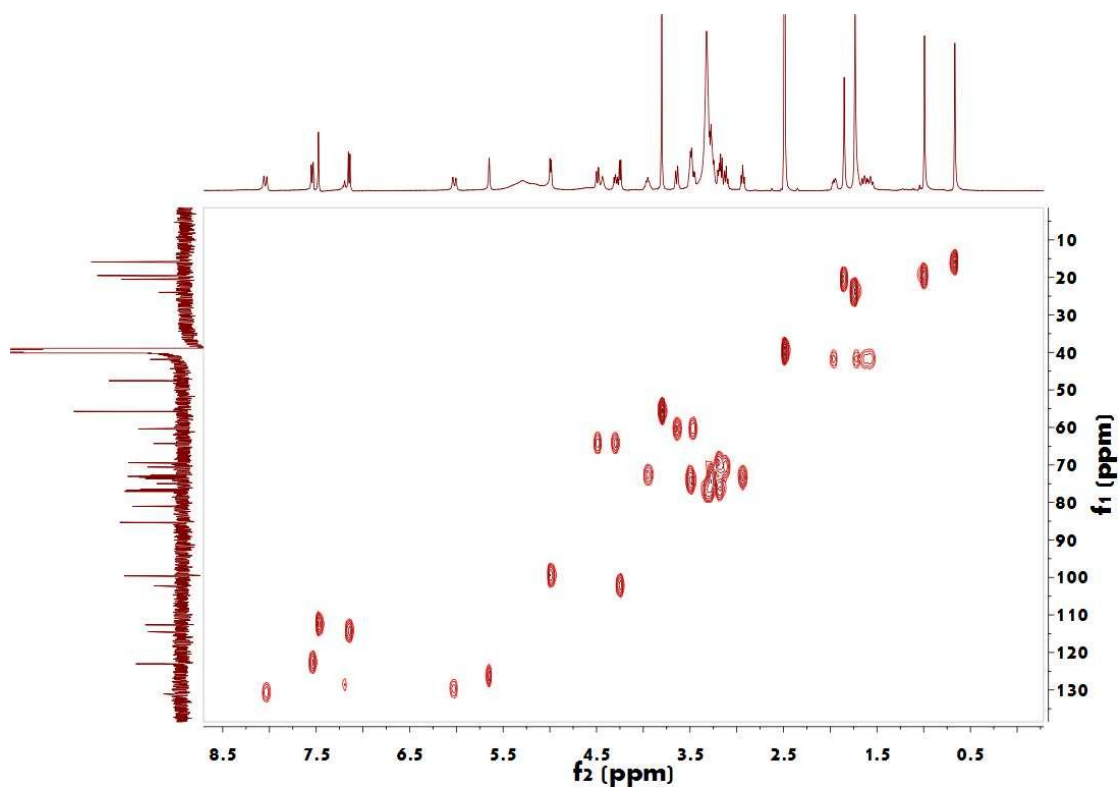

Figure S21. The HSQC spectrum of compound **3\*** in  $\text{DMSO-}d_6$

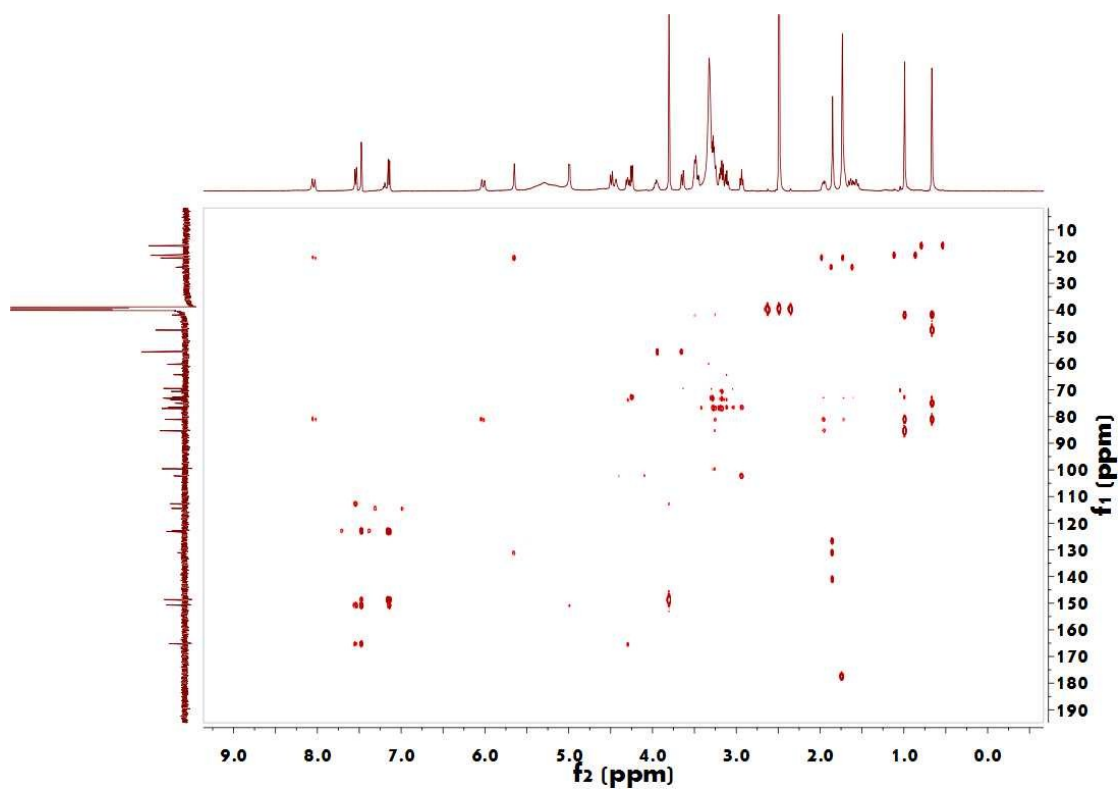

**Figure S22.** The HMBC spectrum of compound **3\*** in DMSO- $d_6$

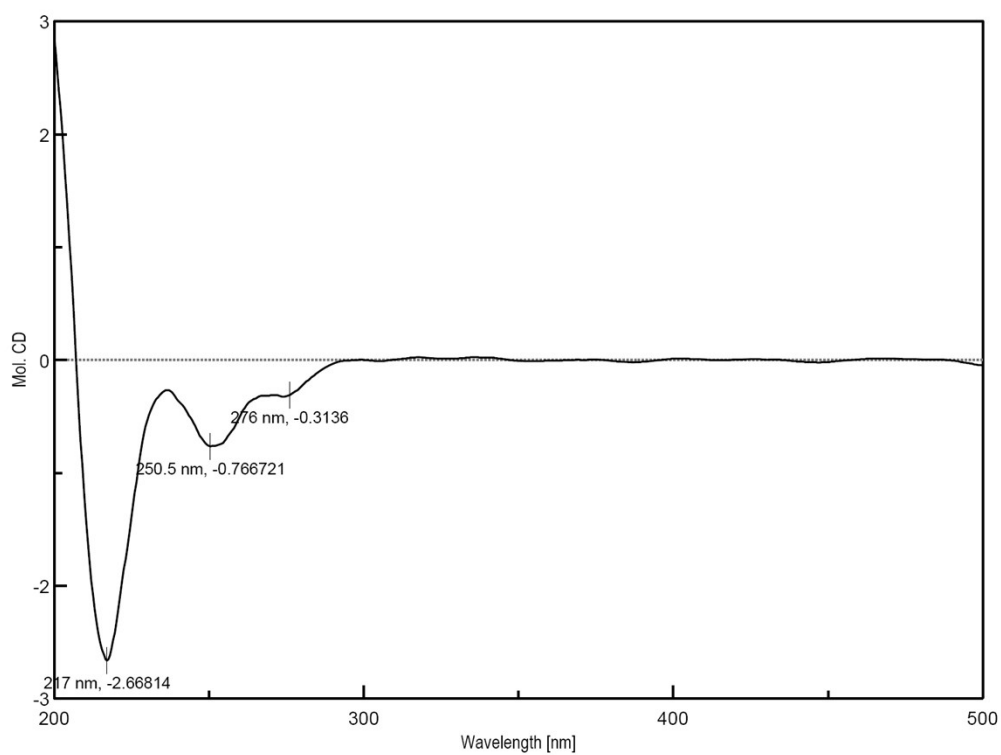

**Figure S23.** The CD spectrum of **3\*** in MeOH



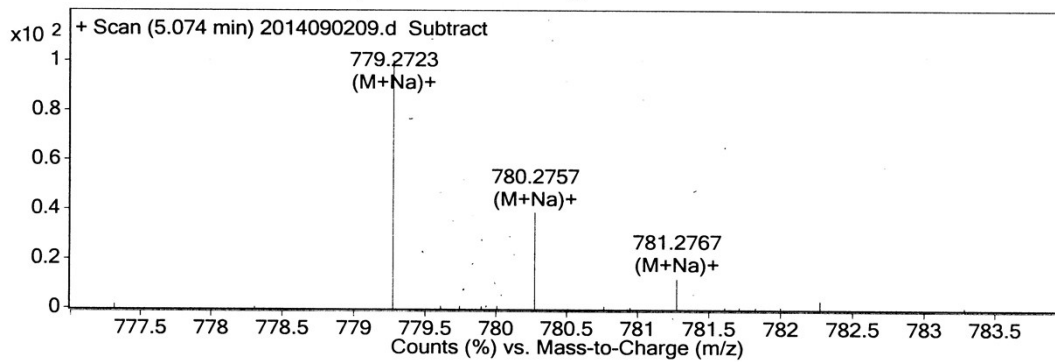

**Figure S24.** The HRESIMS of compound 3\*

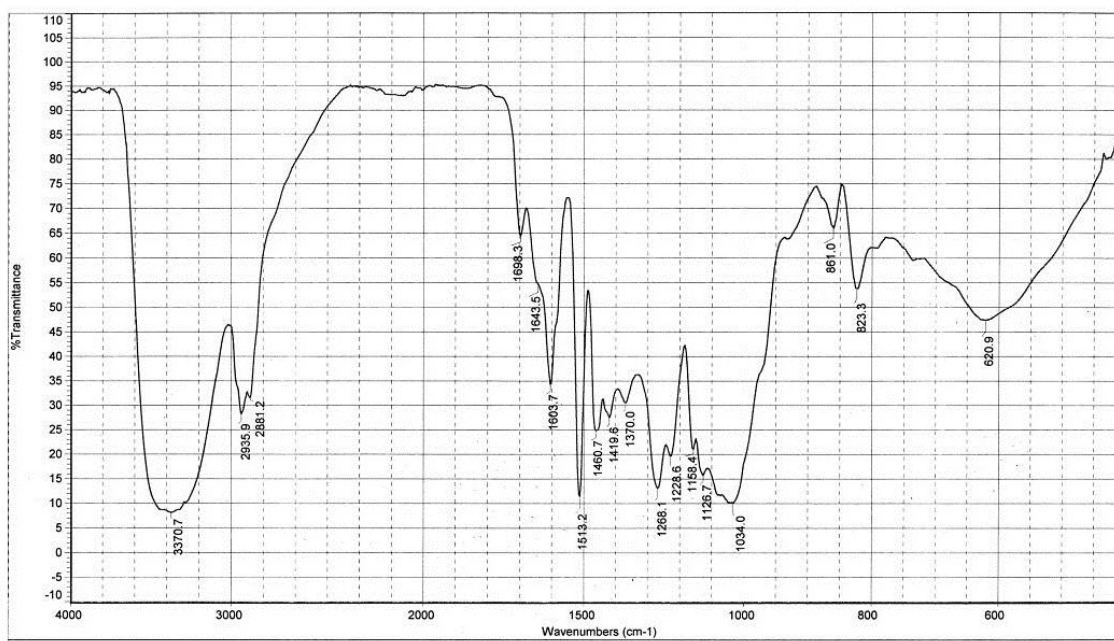

**Figure S25.** The IR spectrum of compound 4\*

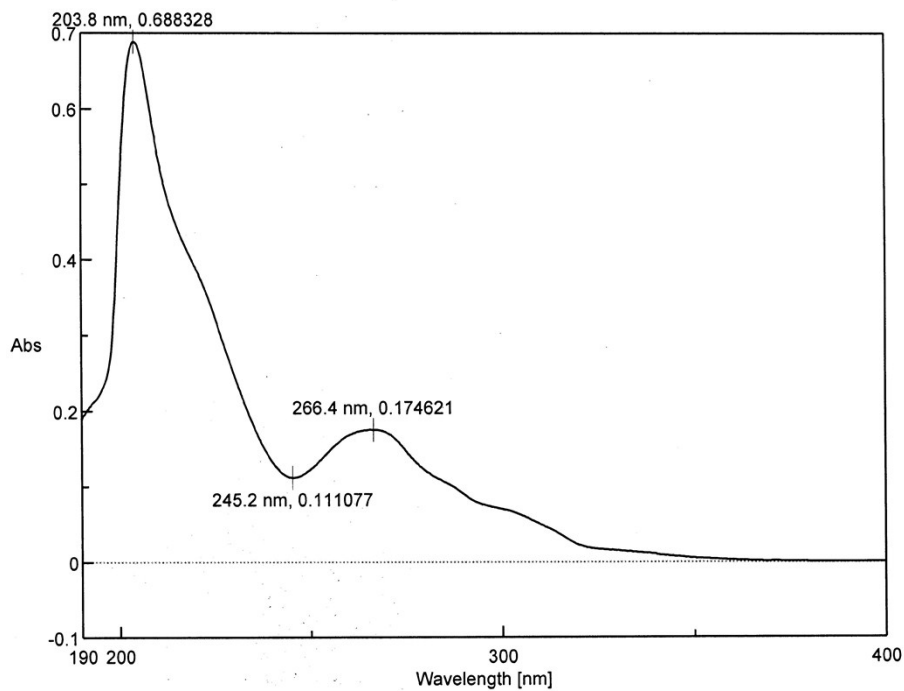

Figure S26. The UV spectrum of compound 4\*

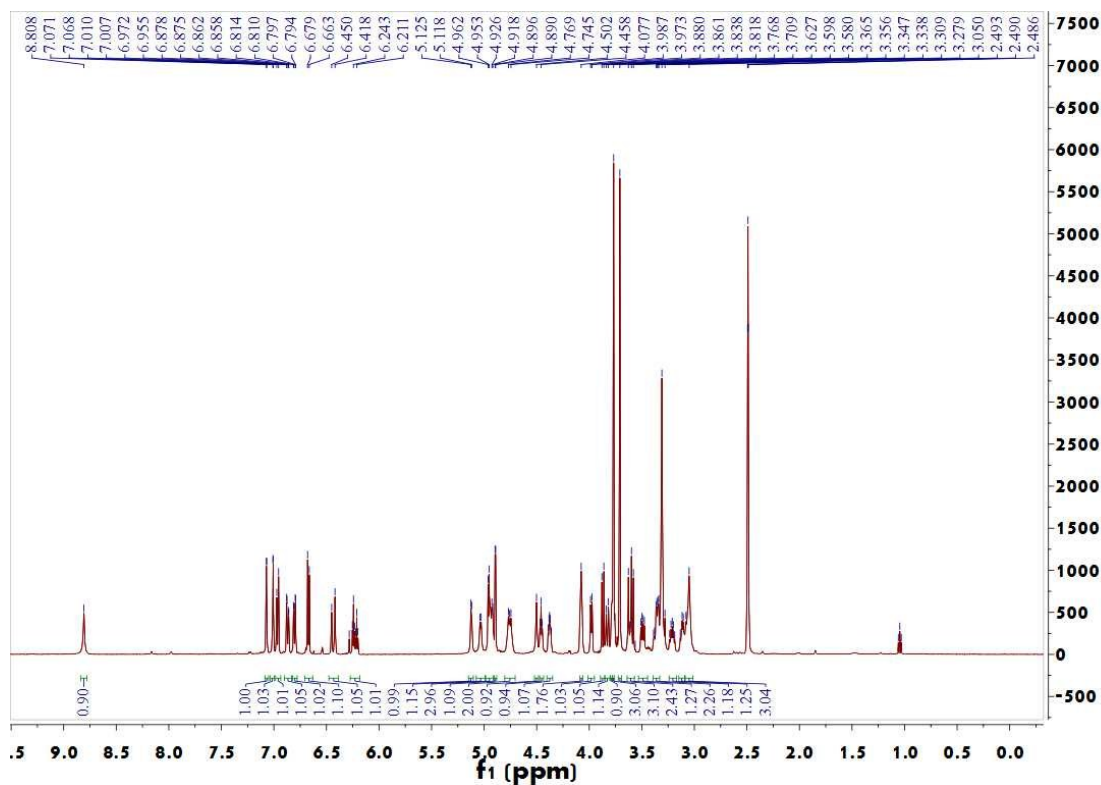

Figure S27. The <sup>1</sup>H NMR spectrum of compound 4\* in DMSO-*d*<sub>6</sub>

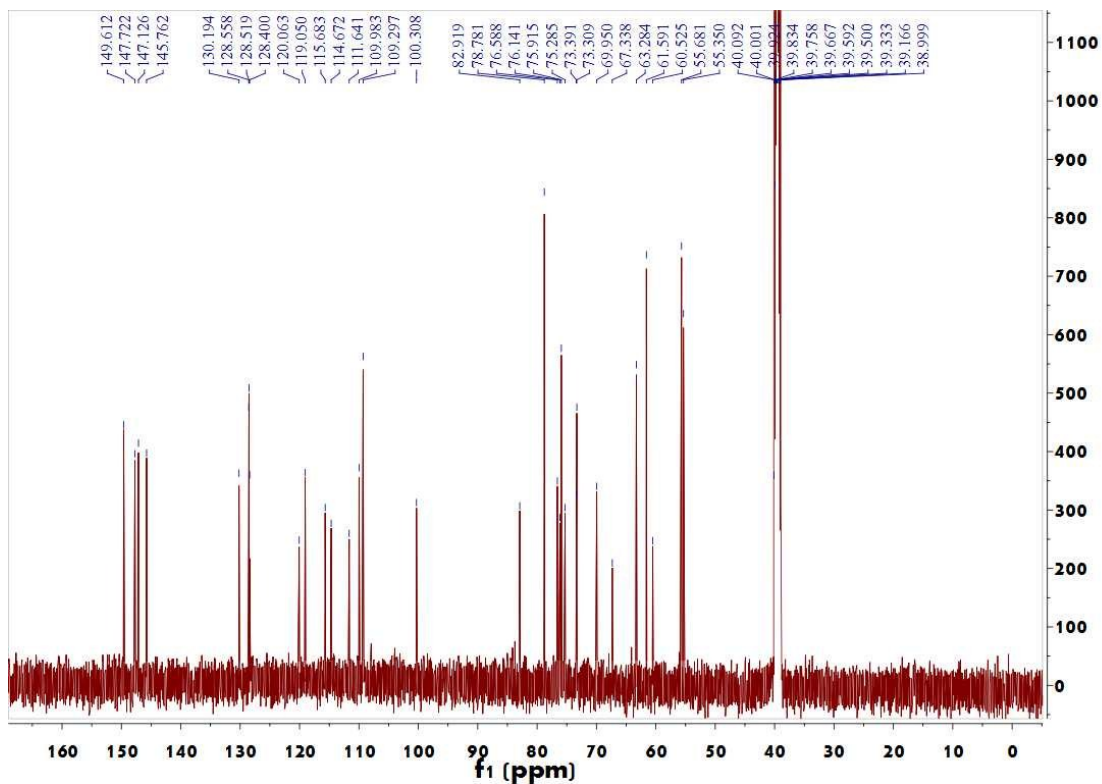

Figure S28. The  $^{13}\text{C}$  NMR spectrum of compound **4\*** in  $\text{DMSO-}d_6$

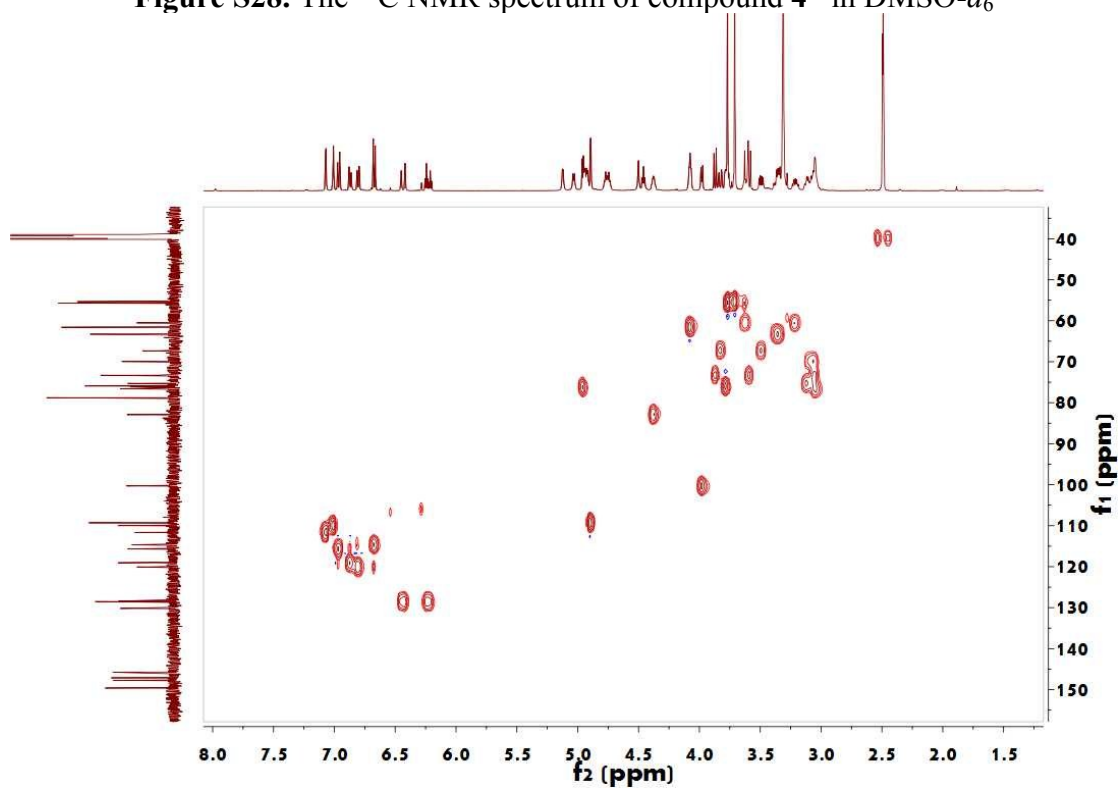

Figure S29. The HSQC spectrum of compound **4\*** in  $\text{DMSO-}d_6$

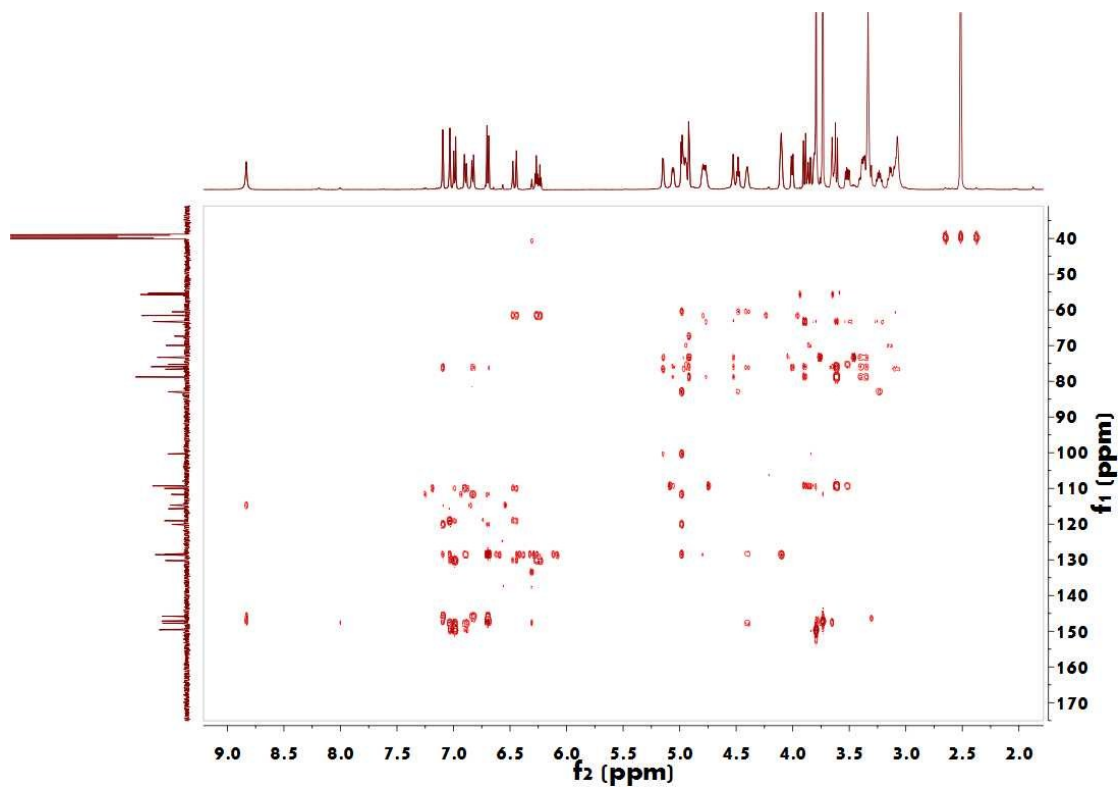

**Figure S30.** The HMBC spectrum of compound **4\*** in DMSO- $d_6$

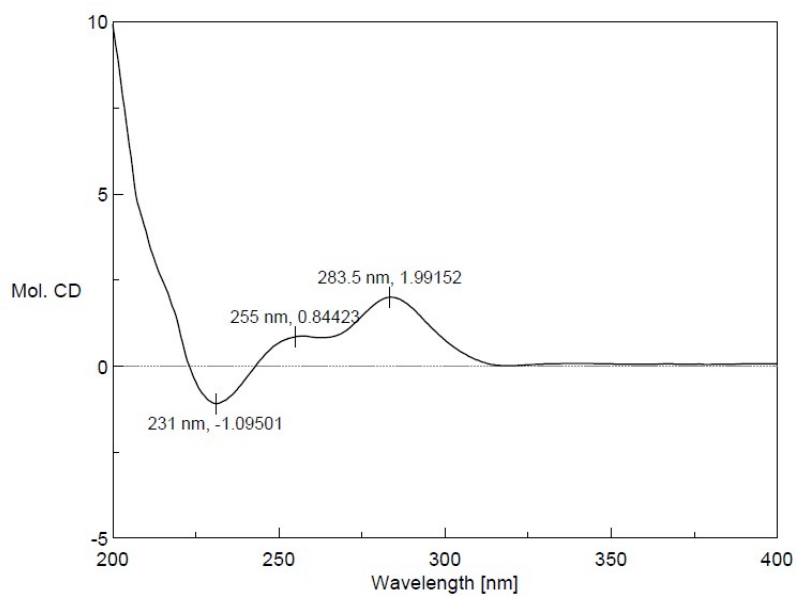

**Figure S31.** The CD spectrum of **4\*** in MeOH

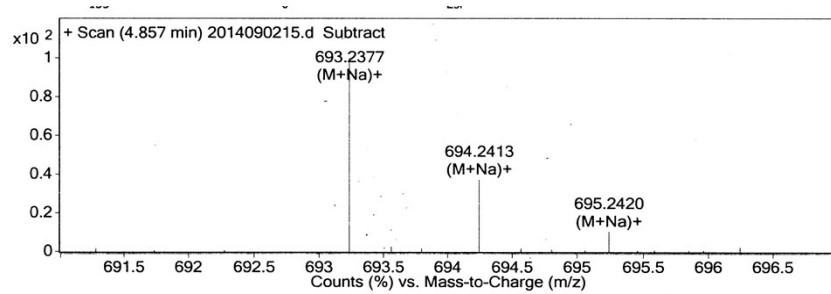

Figure S32. The HRESIMS of compound 4\*

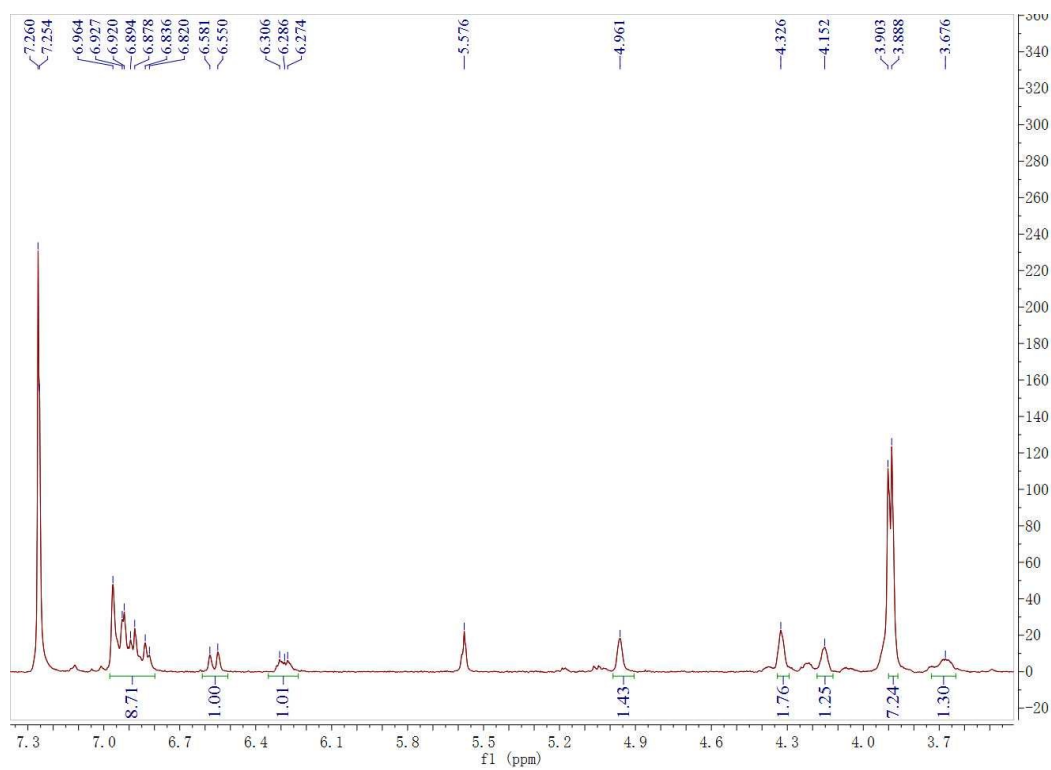

Figure S33. The <sup>1</sup>H NMR spectrum of compound 4a in CDCl<sub>3</sub>

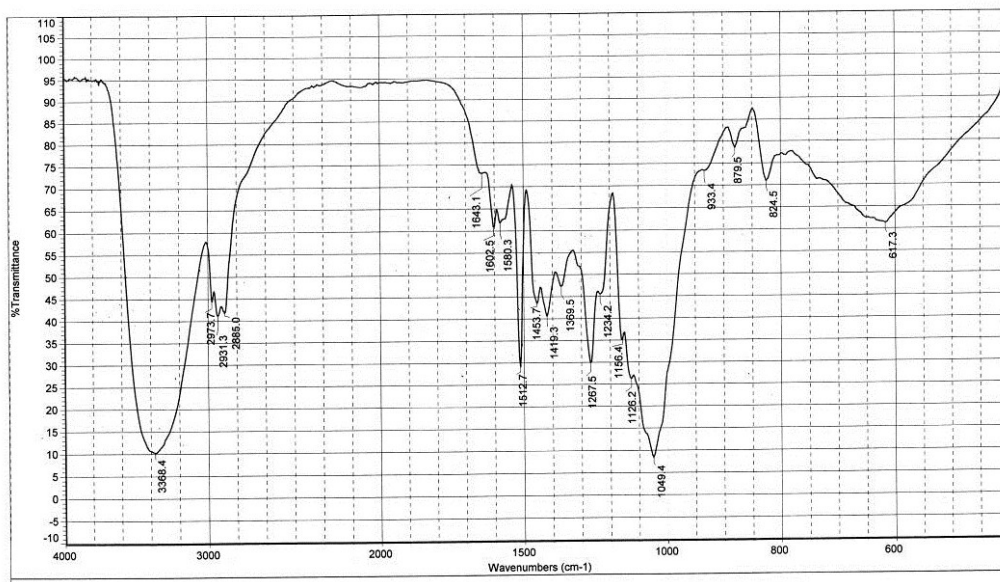

Figure S34. The IR spectrum of compound 5\*

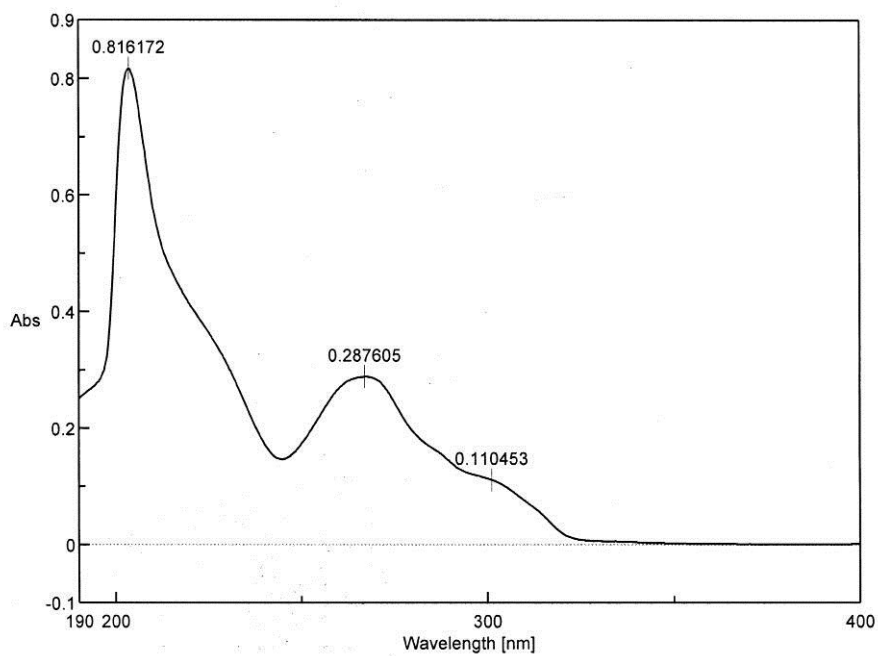

Figure S35. The UV spectrum of compound 5\*

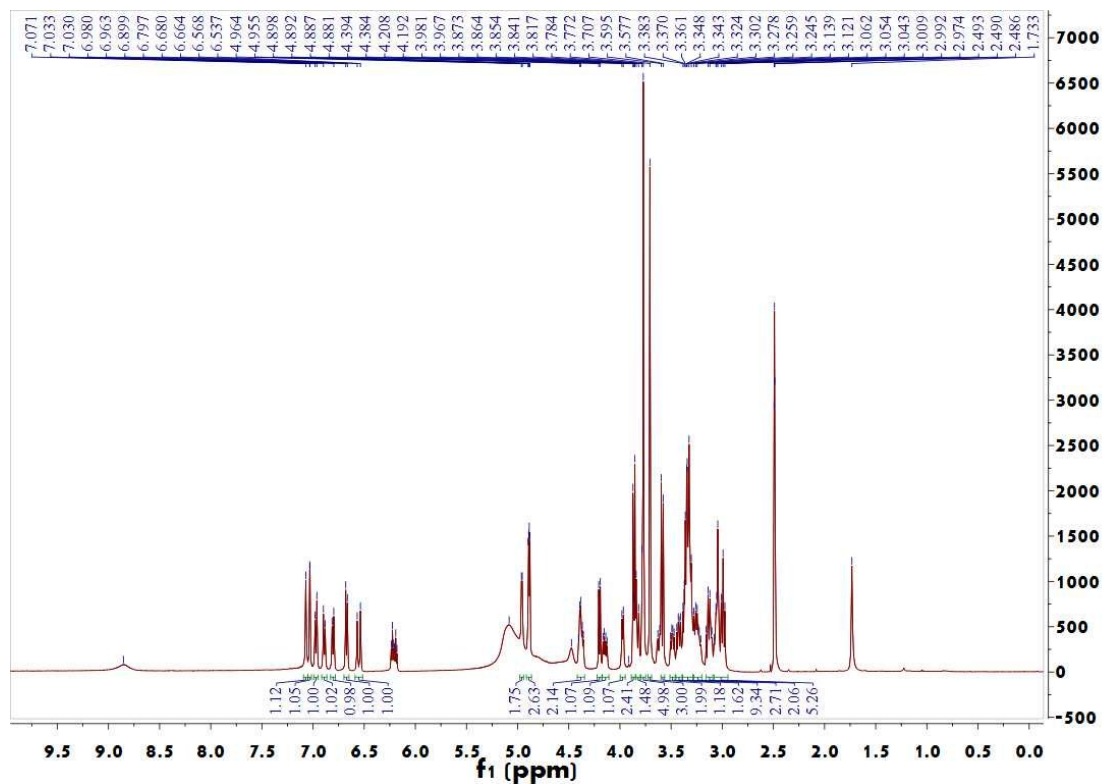

Figure S36. The  $^1\text{H}$  NMR spectrum of compound **5\*** in  $\text{DMSO-}d_6$

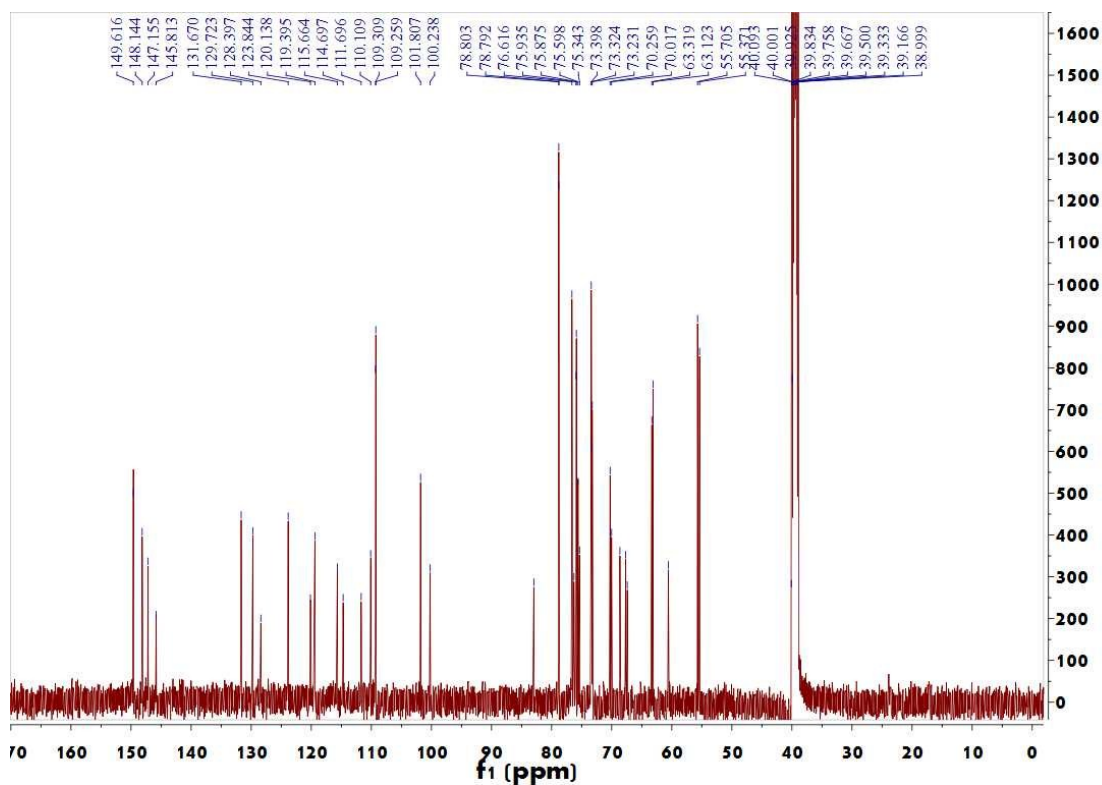

Figure S37. The  $^{13}\text{C}$  NMR spectrum of compound **5\*** in  $\text{DMSO-}d_6$

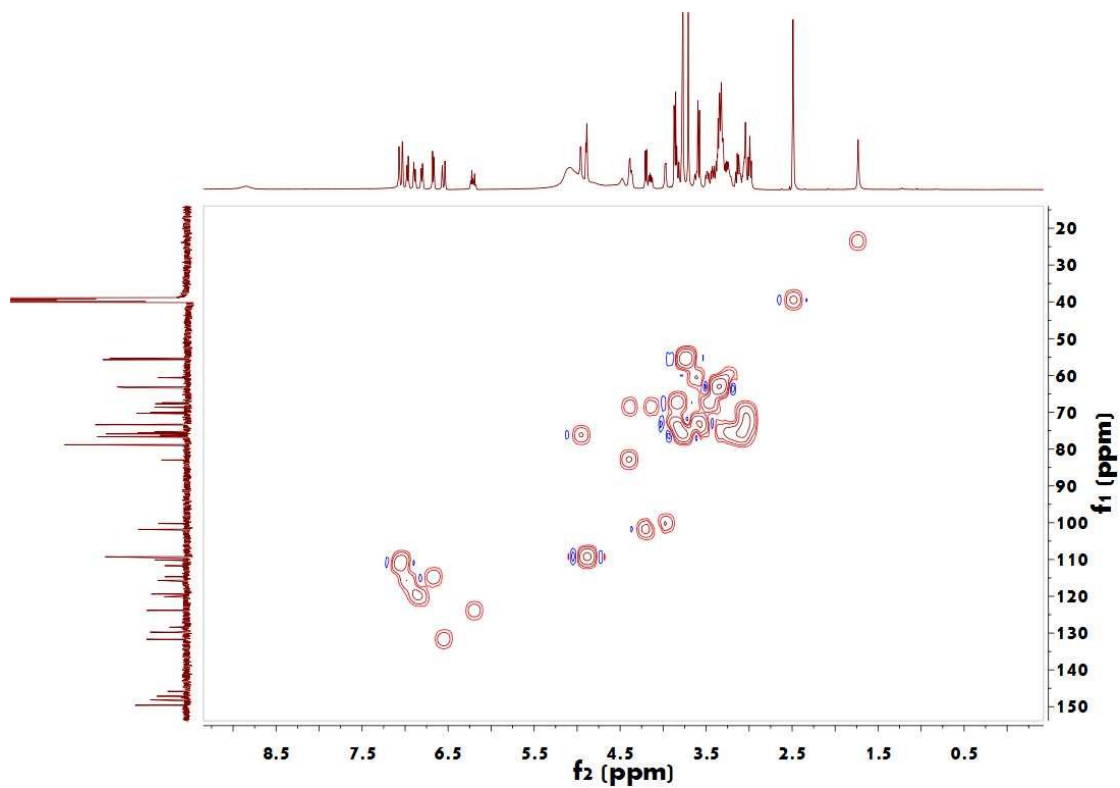

Figure S38. The HSQC spectrum of compound **5\*** in DMSO-*d*<sub>6</sub>

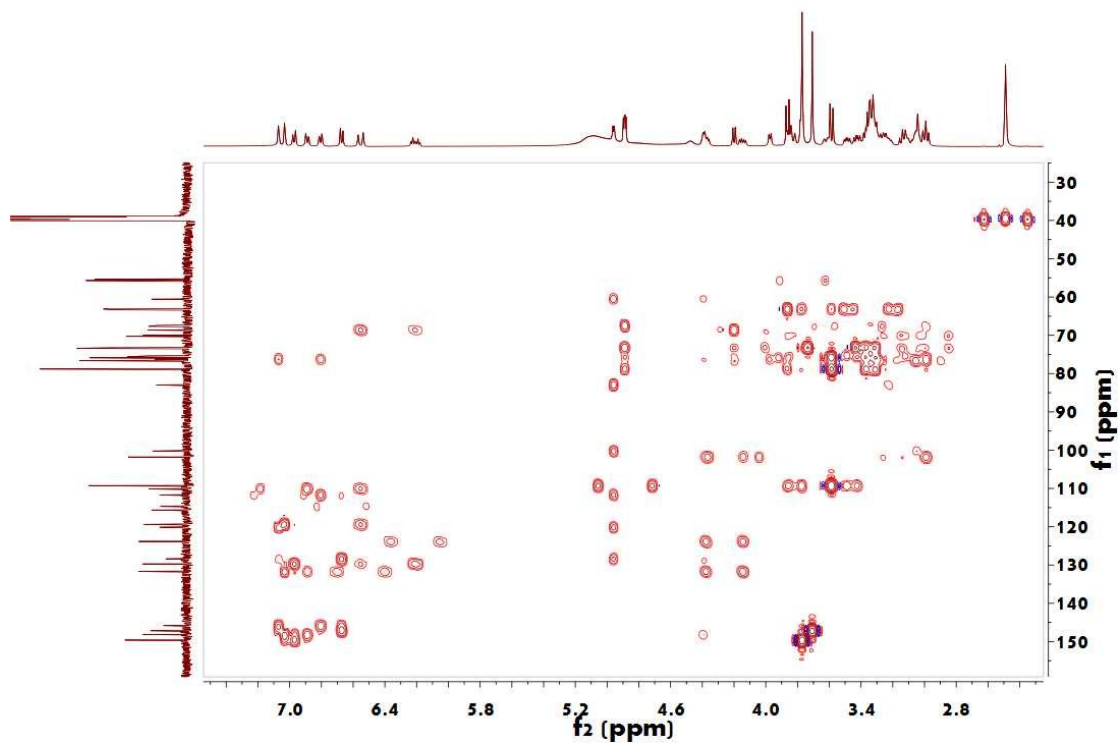

Figure S39. The HMBC spectrum of compound **5\*** in DMSO-*d*<sub>6</sub>



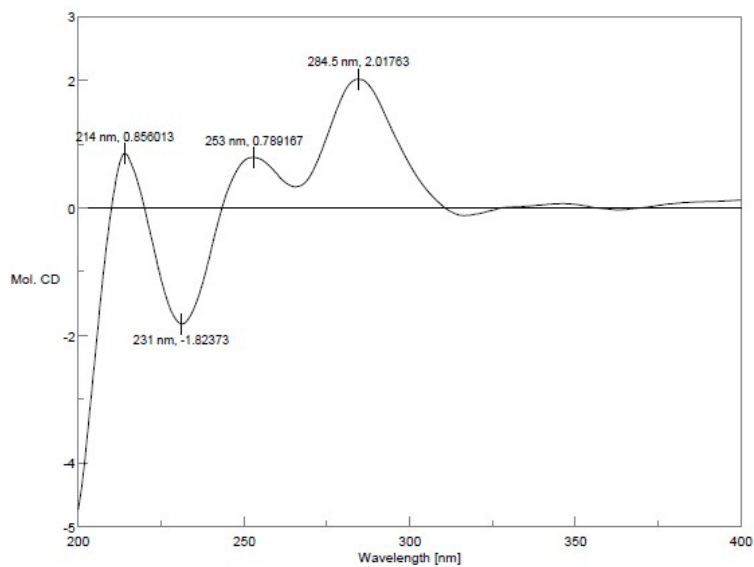

**Figure S40.** The CD spectrum of **5\*** in MeOH

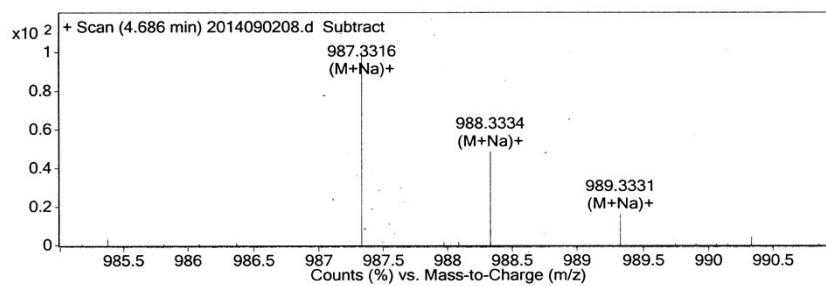

**Figure S41.** The HRESIMS of compound **5\***

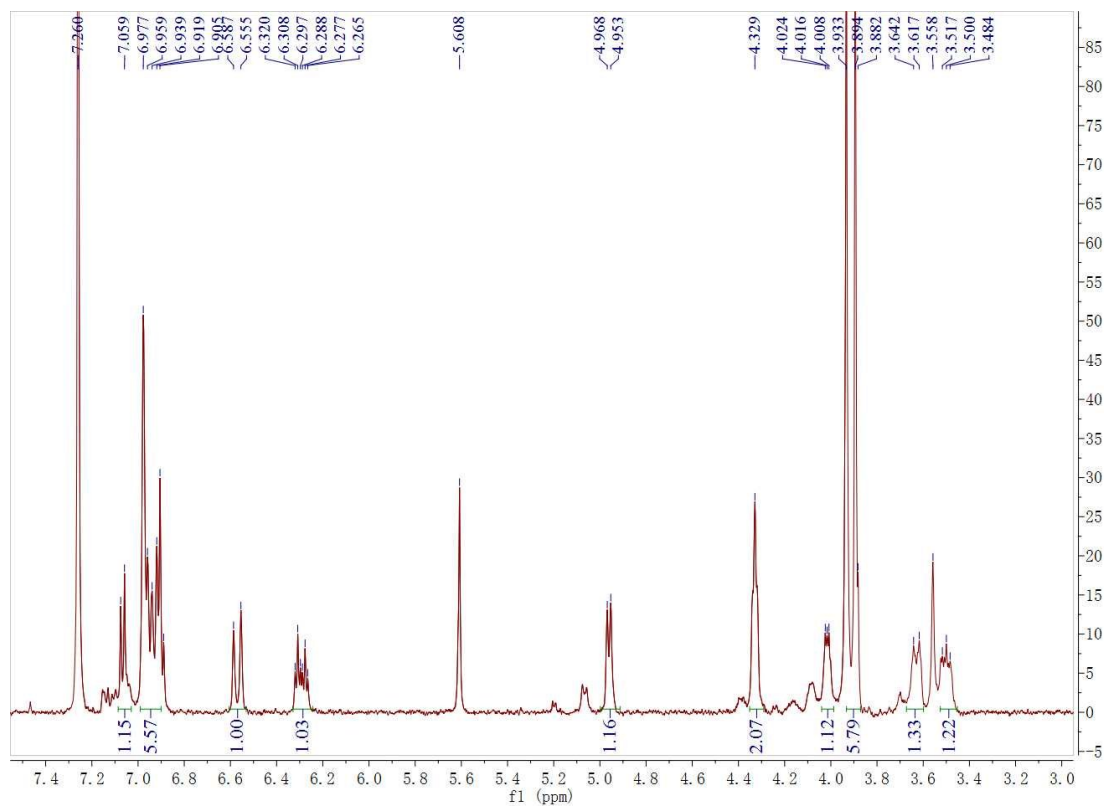

Figure S42. The  $^1\text{H}$  NMR spectrum of compound **5a** in  $\text{CDCl}_3$

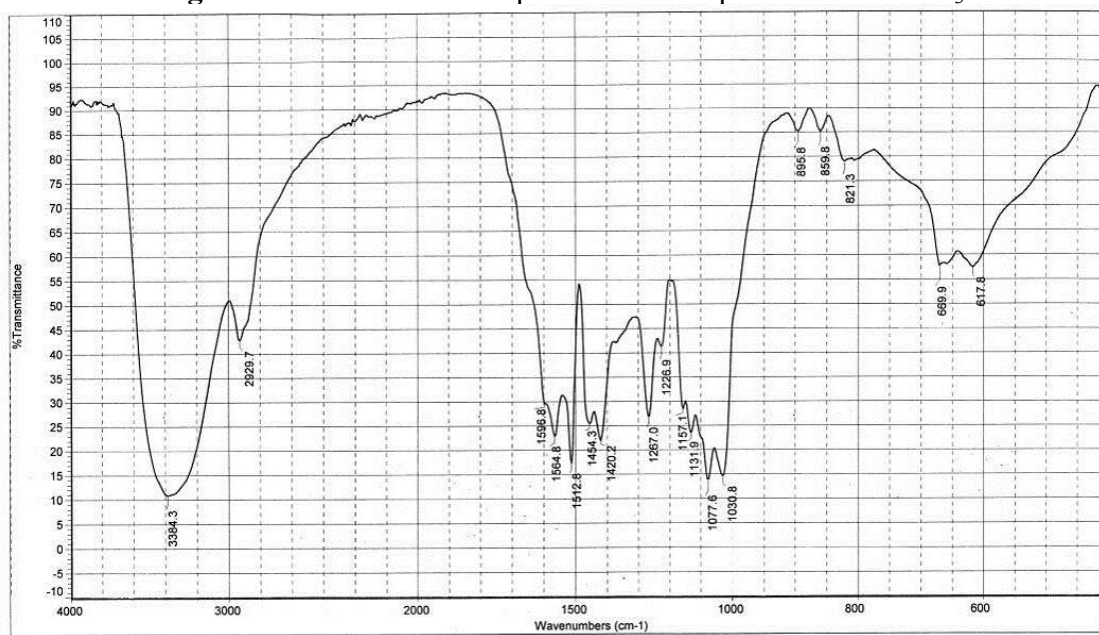

Figure S43. The IR spectrum of compound **6\***

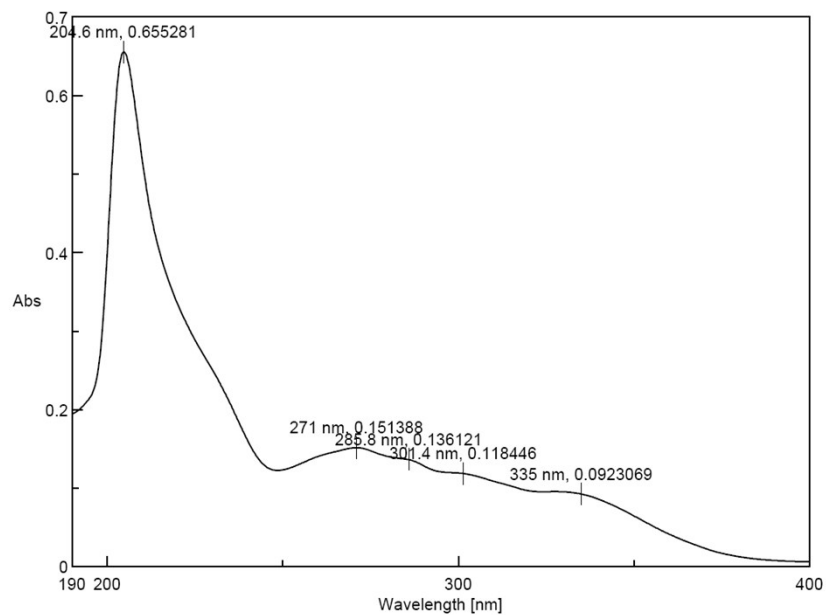

Figure S44. The UV spectrum of compound 6\*

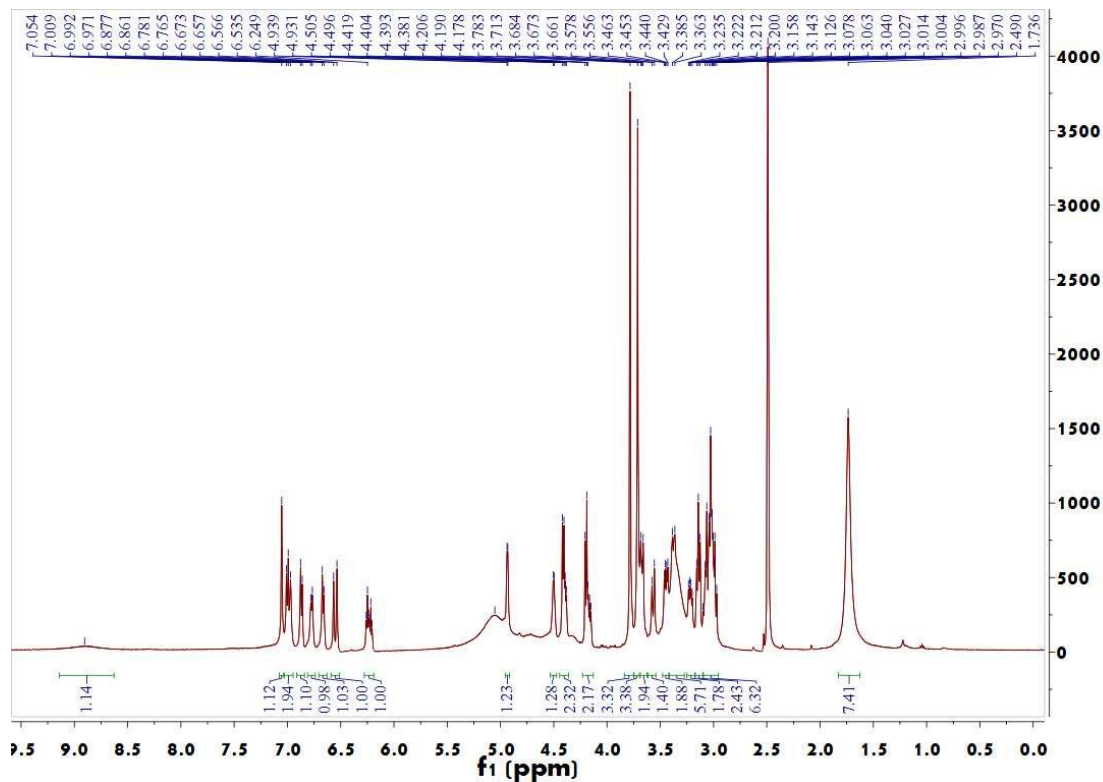

Figure S45. The <sup>1</sup>H NMR spectrum of compound 6\* in DMSO-*d*<sub>6</sub>

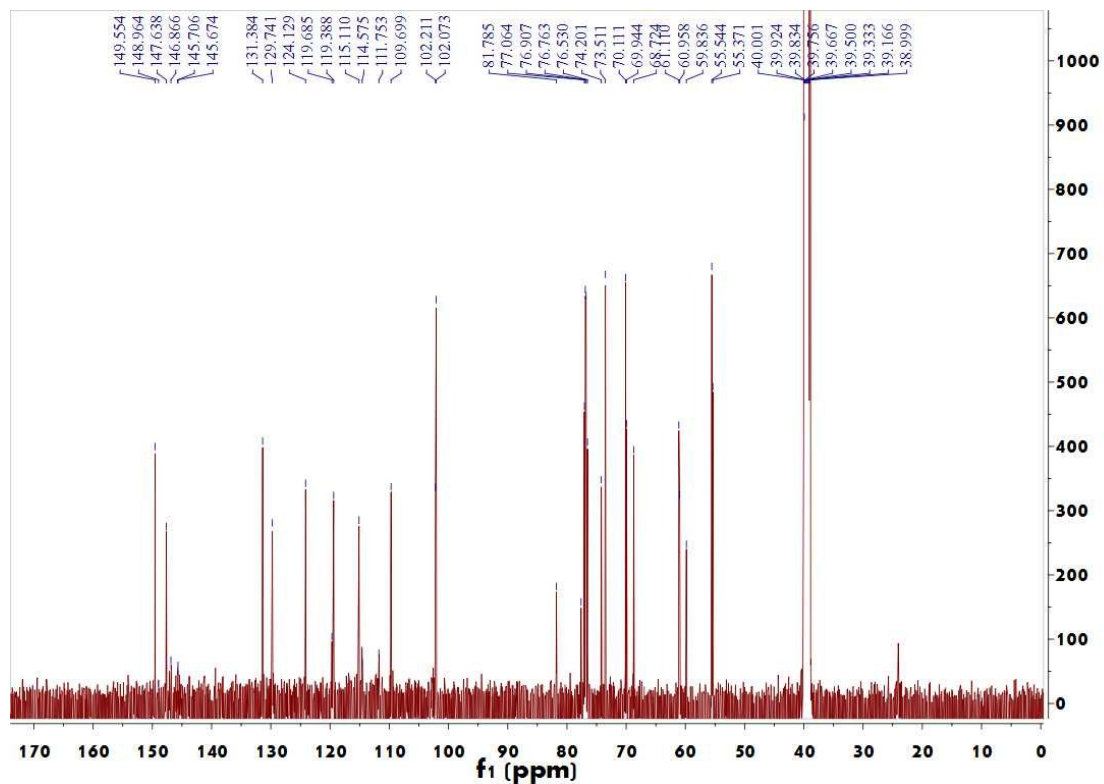

Figure S46. The  $^{13}\text{C}$  NMR spectrum of compound **6\*** in  $\text{DMSO-}d_6$

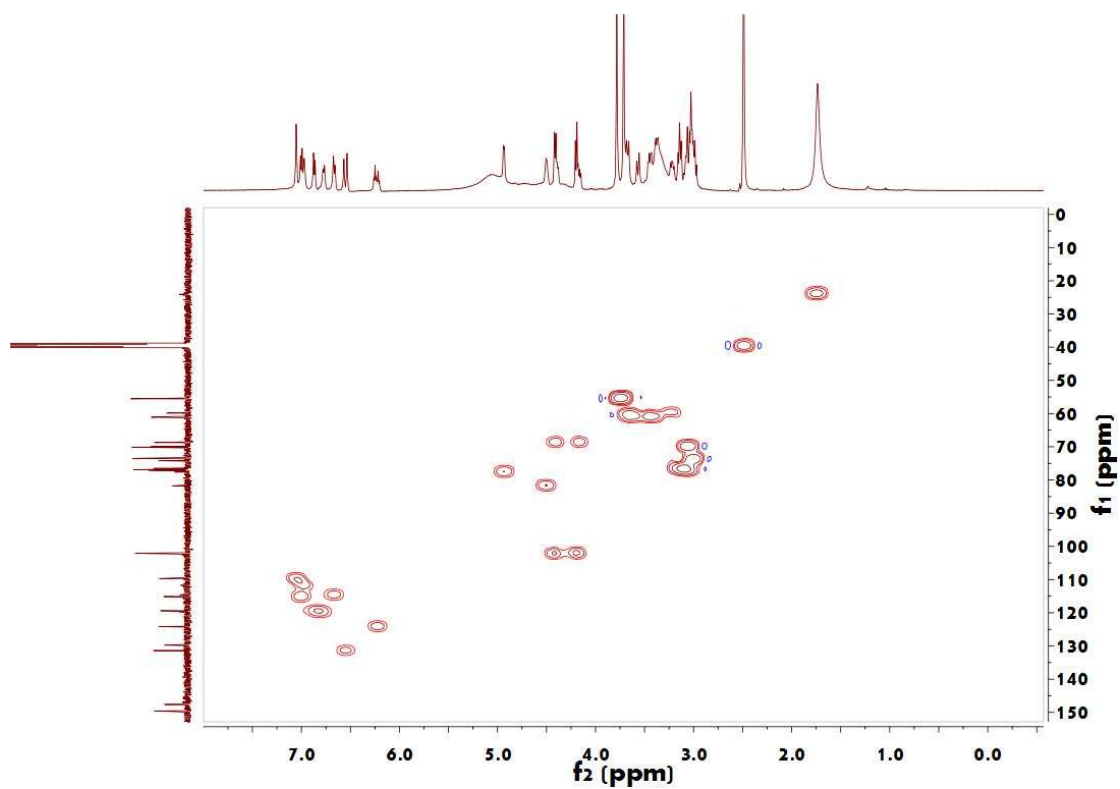

Figure S47. The HSQC spectrum of compound **6\*** in  $\text{DMSO-}d_6$

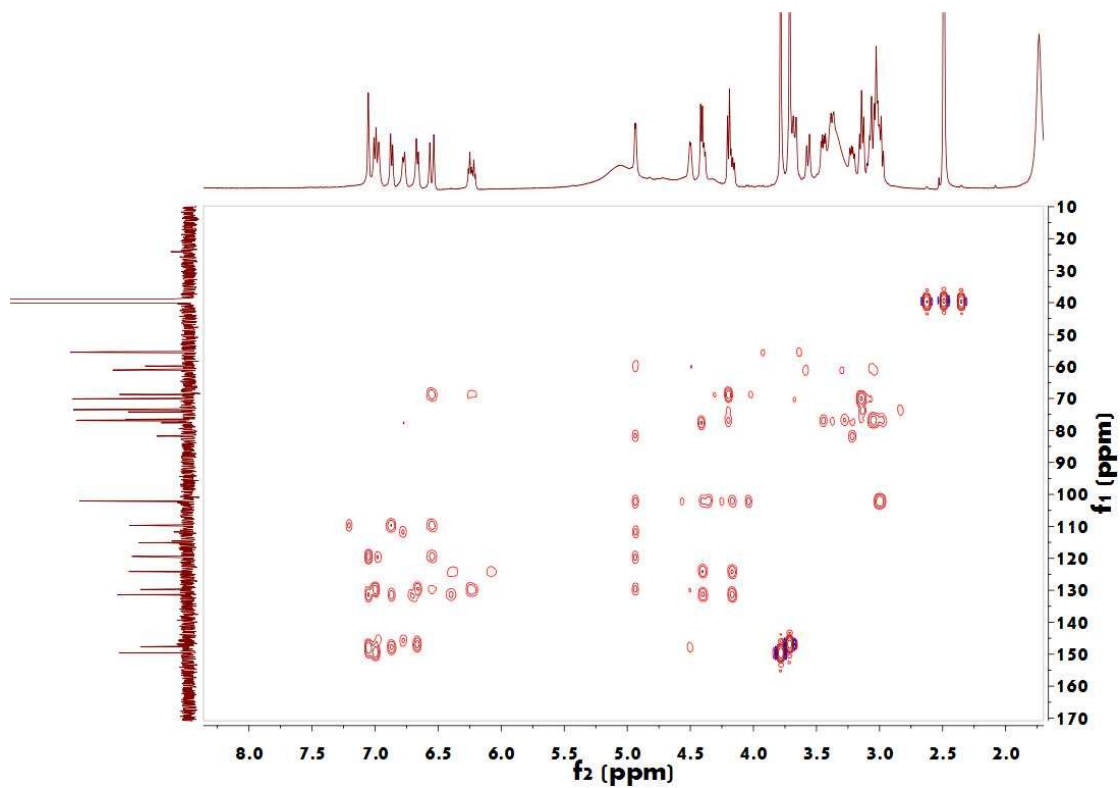

Figure S48. The HMBC spectrum of compound **6\*** in DMSO- $d_6$

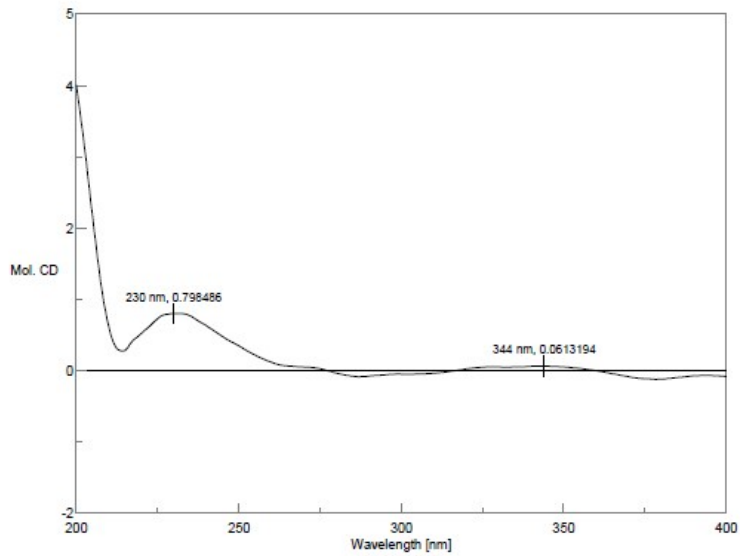

Figure S49. The CD spectrum of **6\*** in MeOH

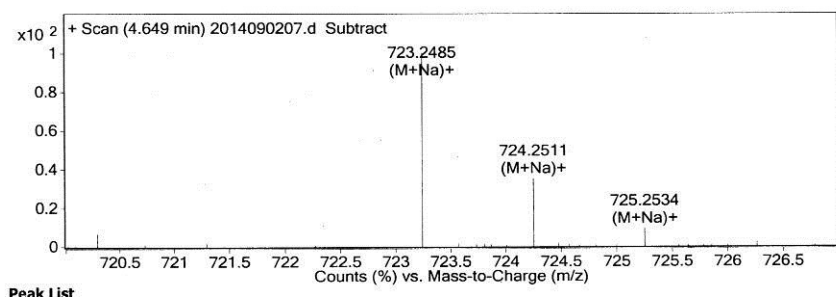

Figure S50. The HRESIMS of compound **6\***

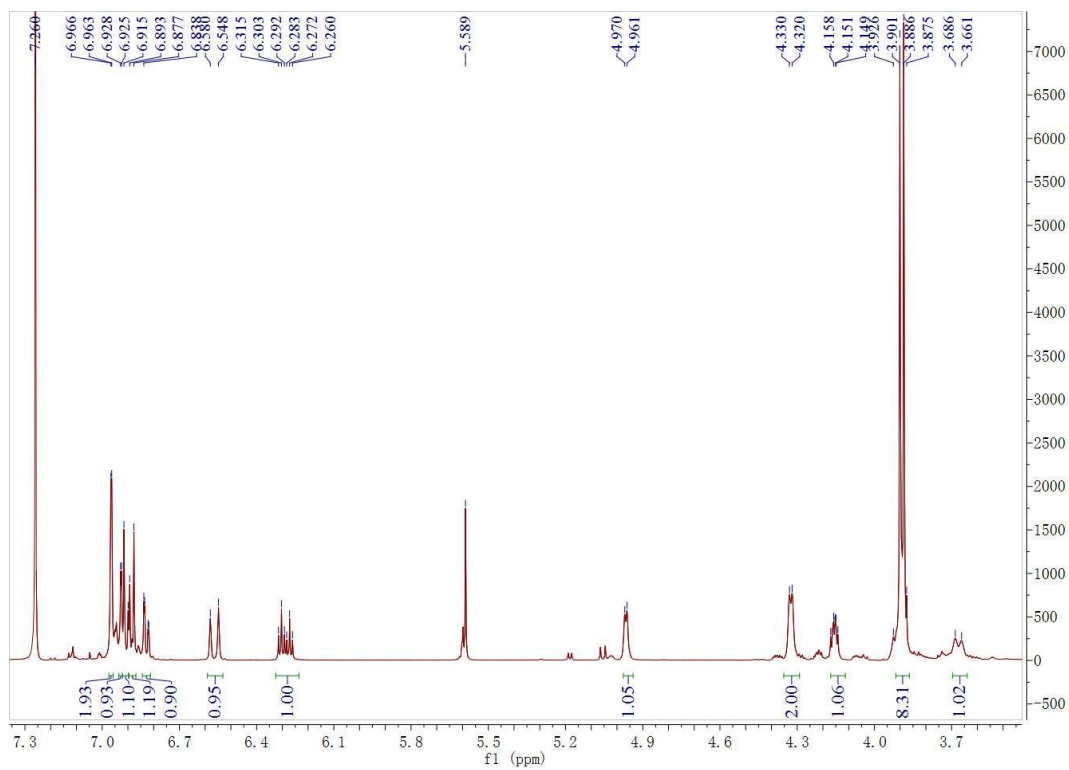

Figure S51. The <sup>1</sup>H NMR spectrum of compound **6a** in CDCl<sub>3</sub>

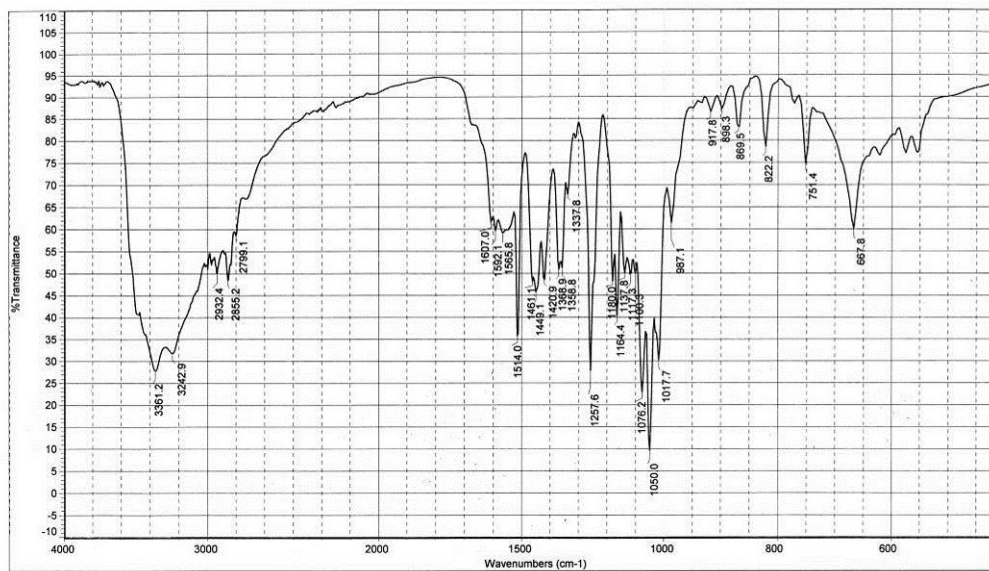

**Figure S52.** The IR spectrum of compound 7\*

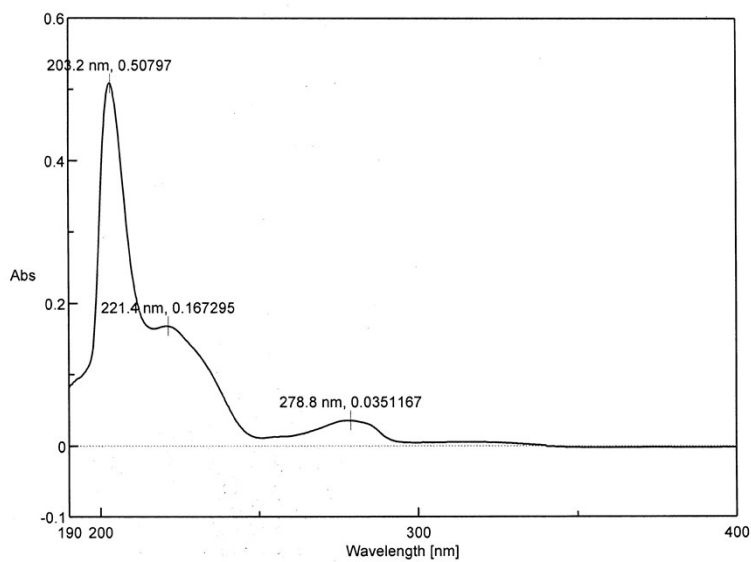

**Figure S53.** The UV spectrum of compound 7\*

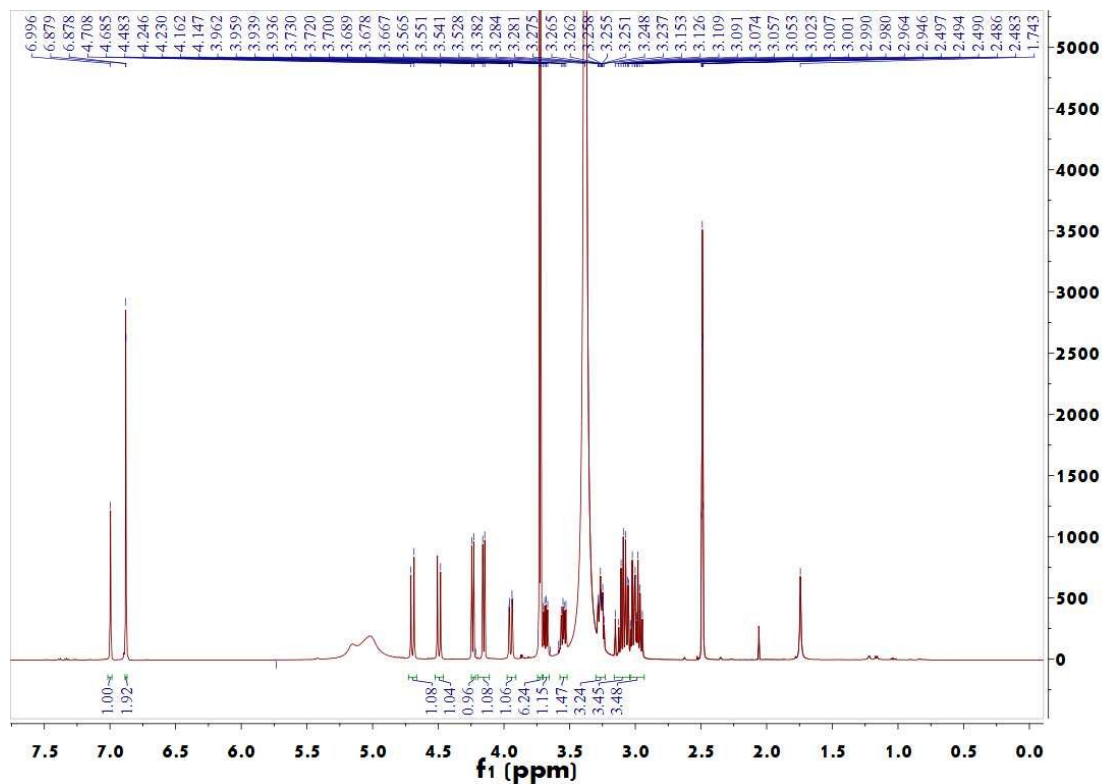

Figure S54. The  $^1\text{H}$  NMR spectrum of compound **7\*** in  $\text{DMSO-}d_6$

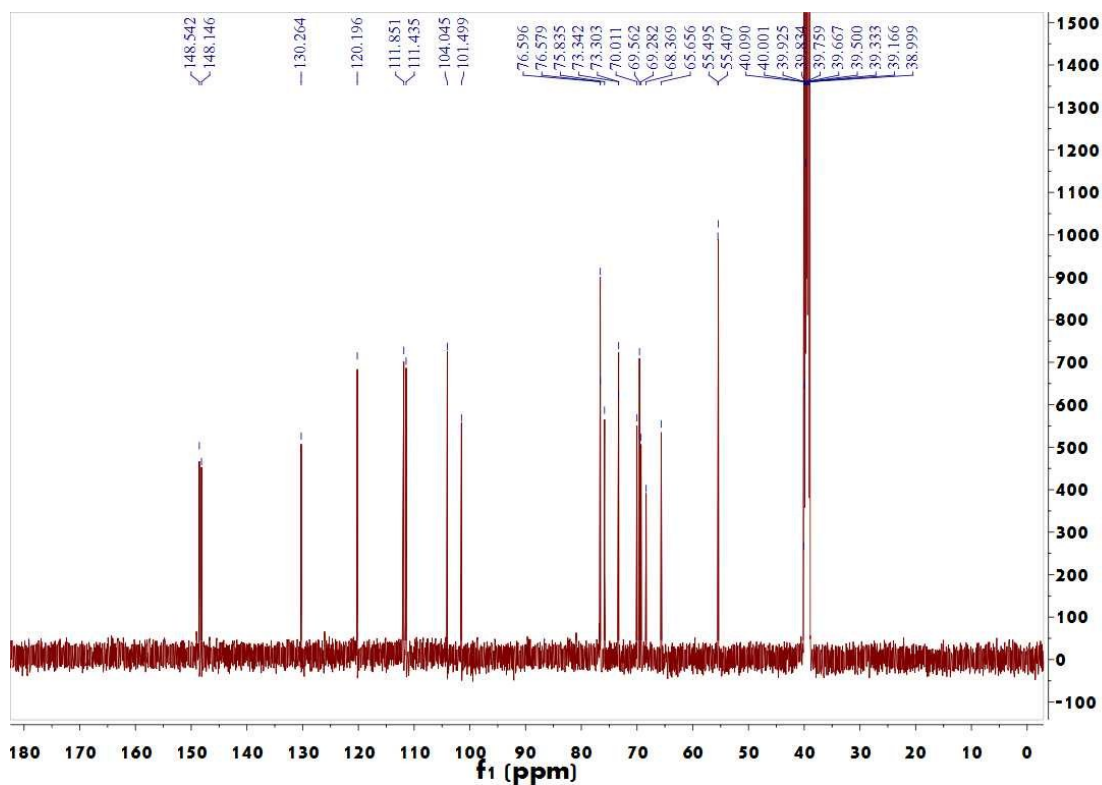

Figure S55. The  $^{13}\text{C}$  NMR spectrum of compound **7\*** in  $\text{DMSO-}d_6$



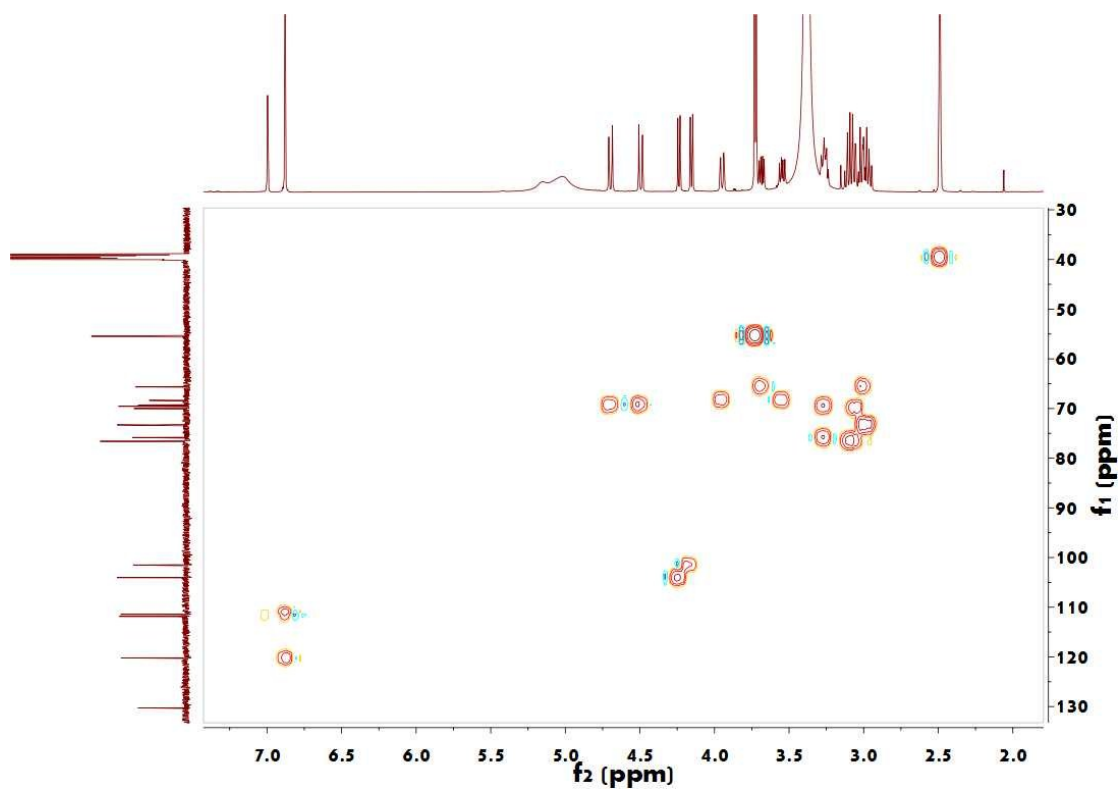

Figure S56. The HSQC spectrum of compound 7\* in DMSO- $d_6$

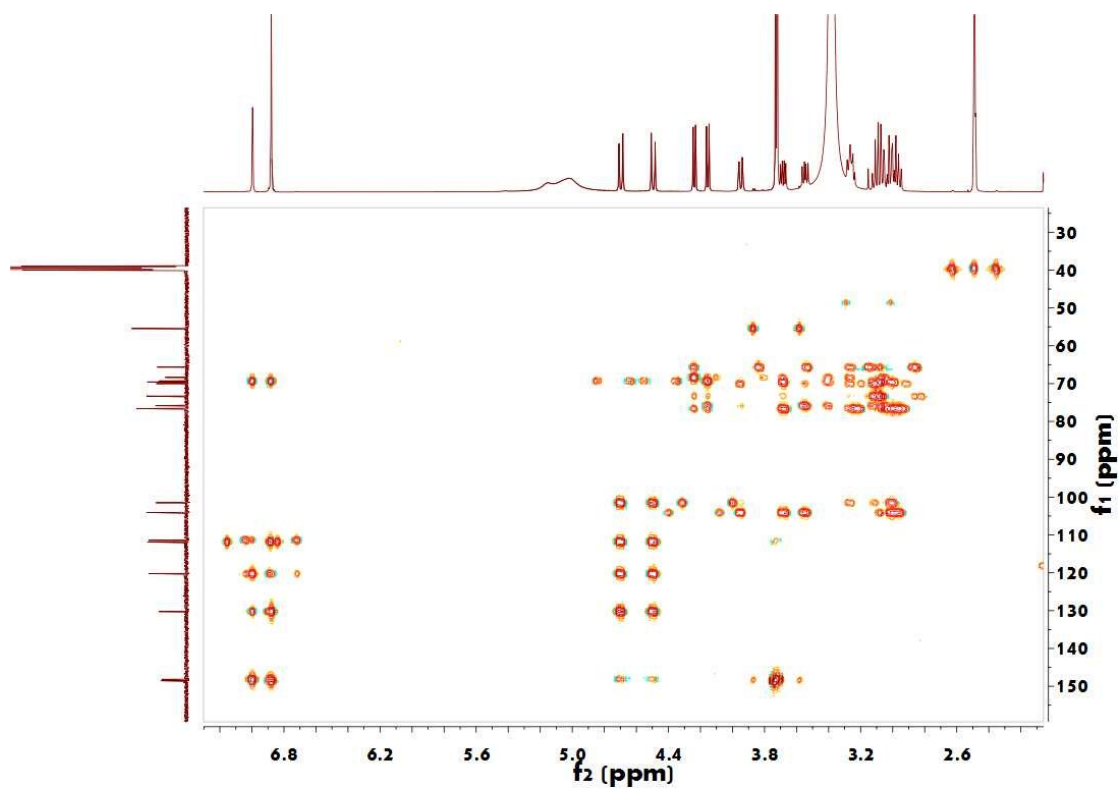

Figure S57. The HMBC spectrum of compound 7\* in DMSO- $d_6$

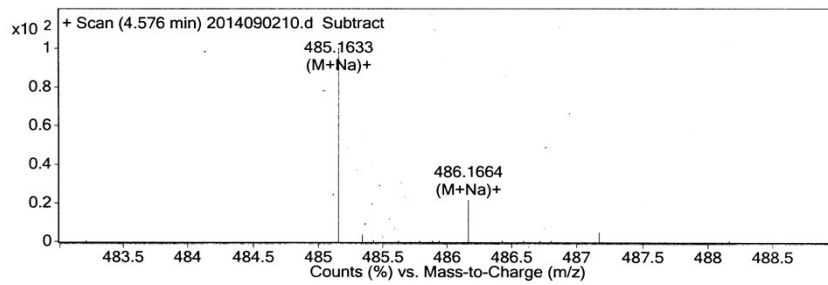

Figure S58. The HRESIMS of compound 14\*

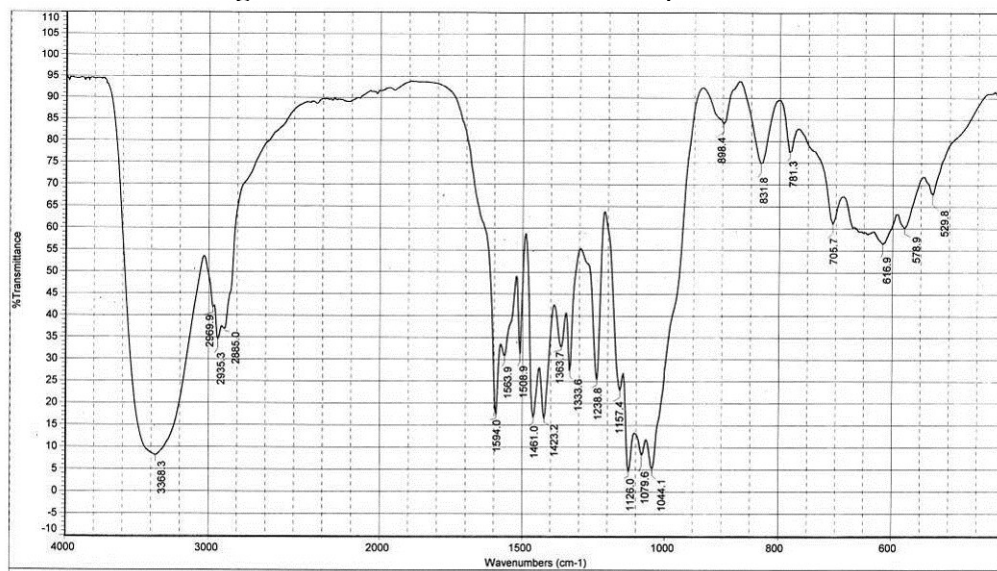

Figure S59. The IR spectrum of compound 8\*

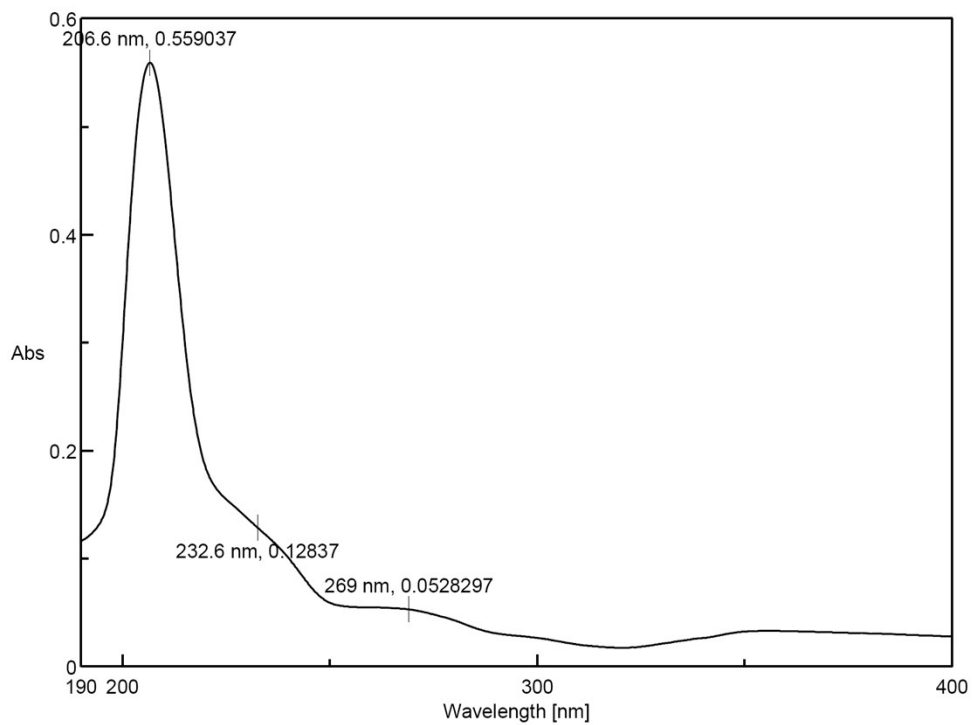

**Figure S60.** The UV spectrum of compound **8\***

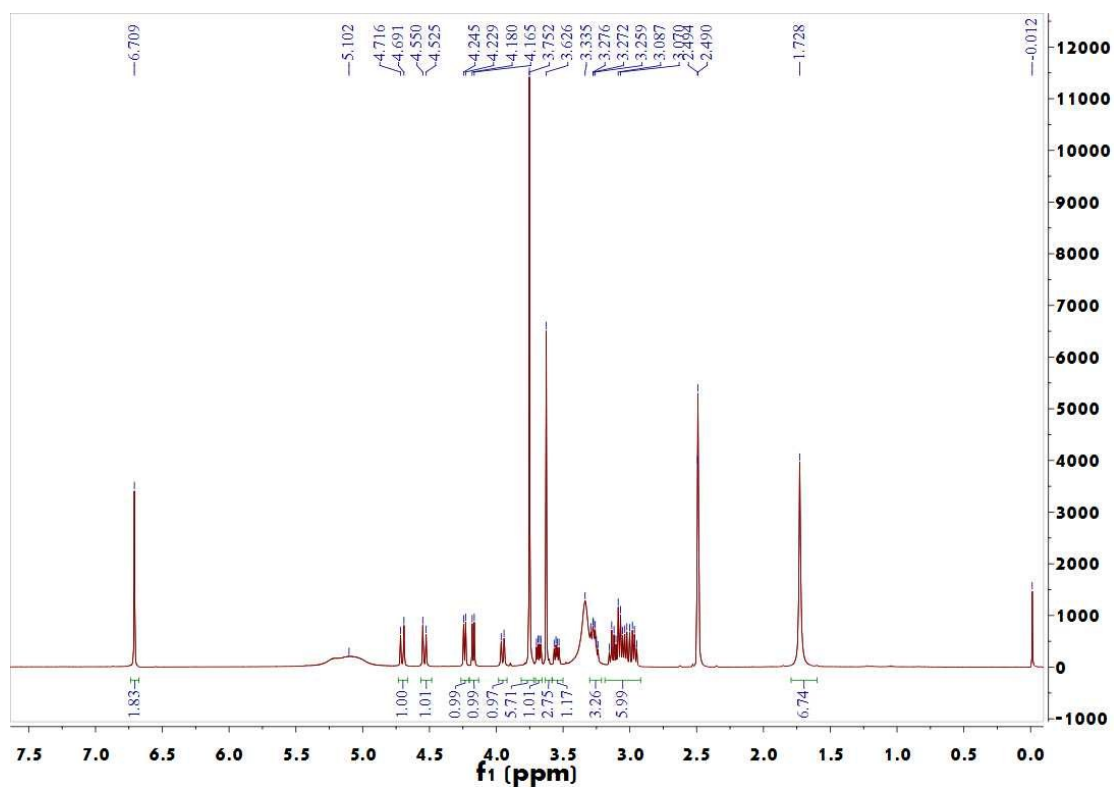

**Figure S61.** The  $^1\text{H}$  NMR spectrum of compound **8\*** in  $\text{DMSO-}d_6$ .

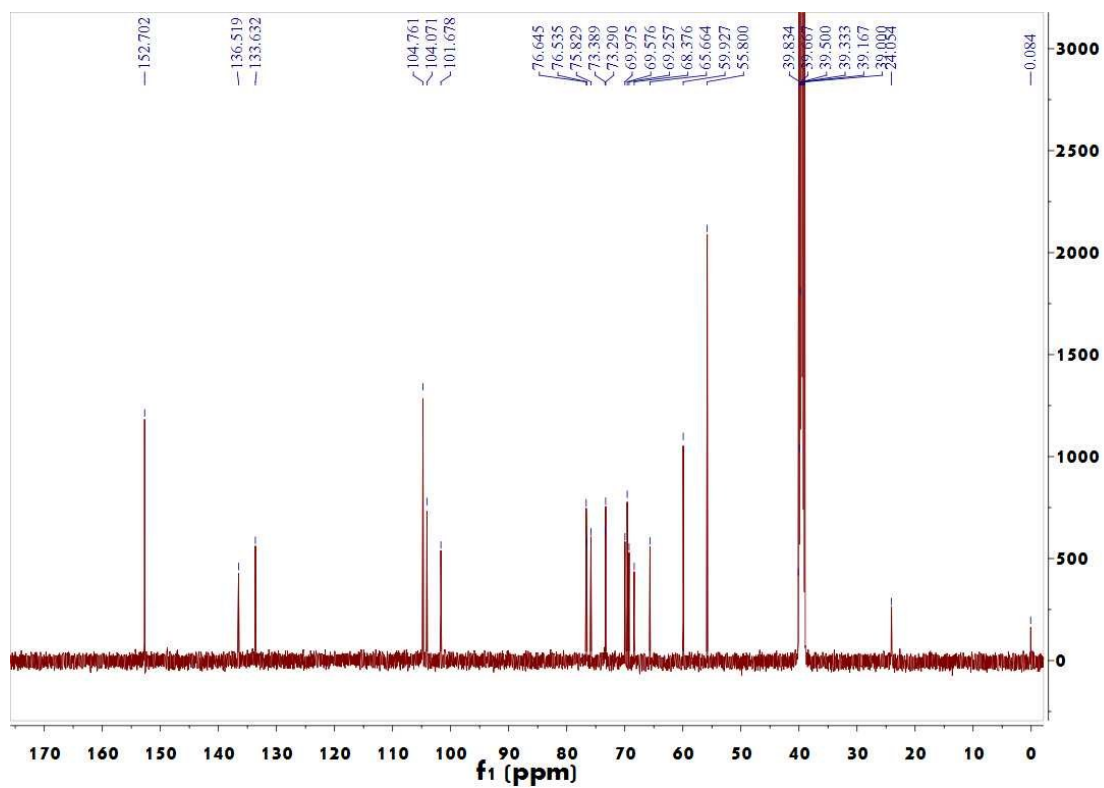

Figure S62. The  $^{13}\text{C}$  NMR spectrum of compound **8\*** in  $\text{DMSO-}d_6$ .

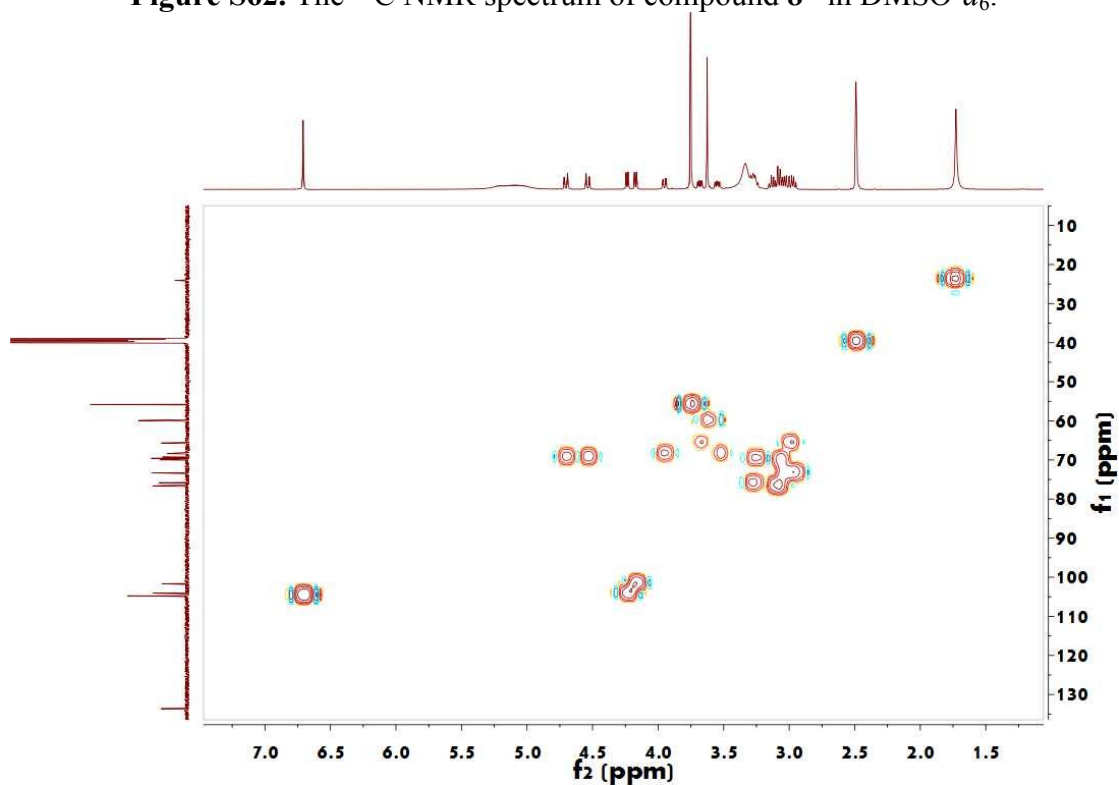

Figure S63. The HSQC spectrum of compound **8\*** in  $\text{DMSO-}d_6$ .

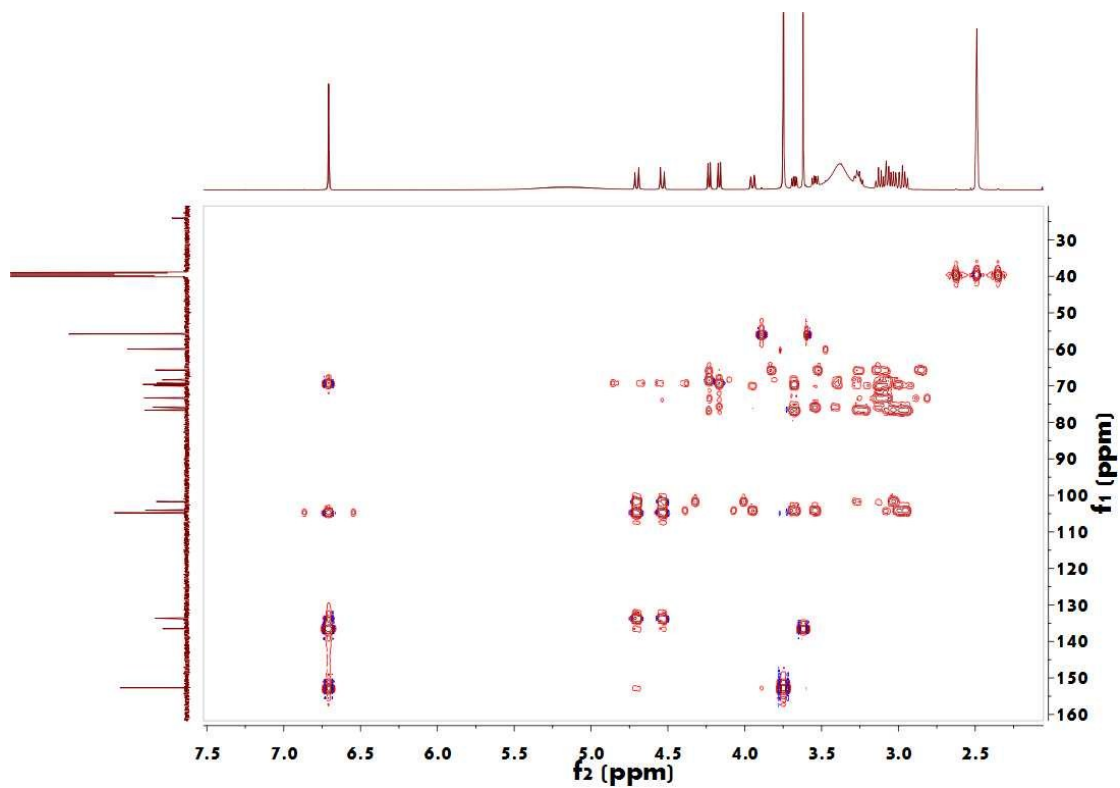

**Figure S64.** The HMBC spectrum of compound **8\*** in DMSO- $d_6$ .

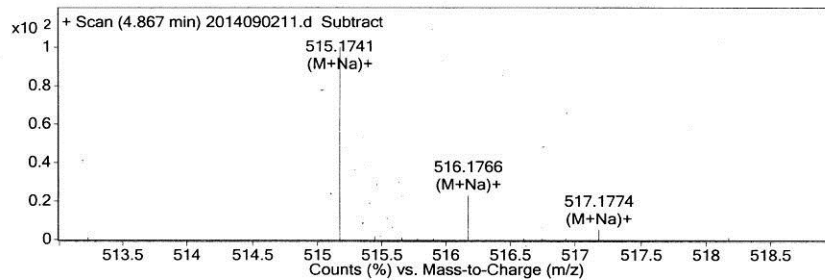

**Figure S65.** The HRESIMS of compound **8\***

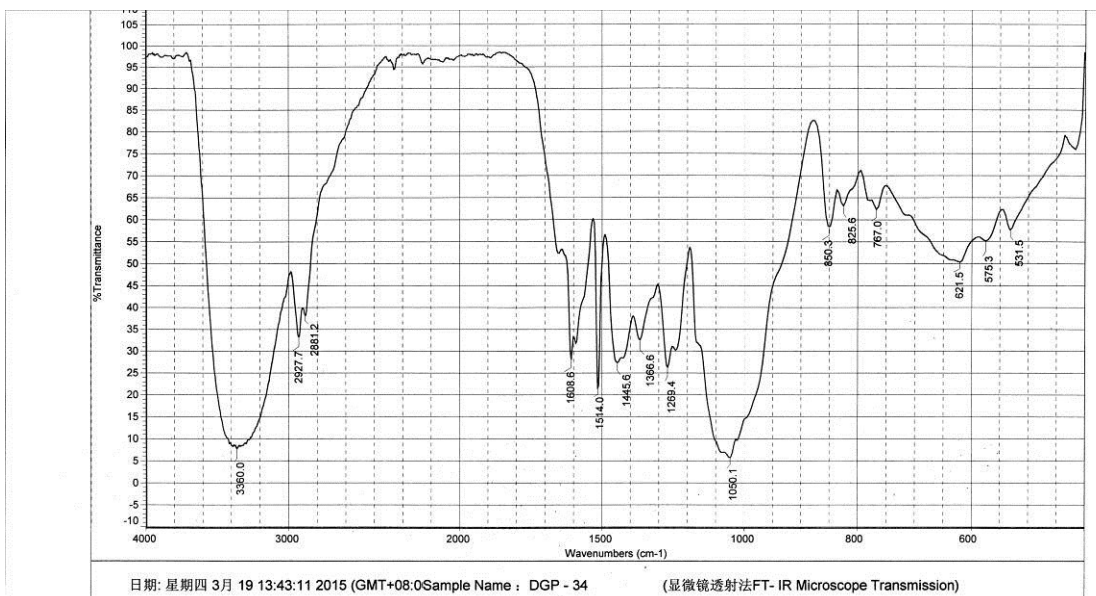

**Figure S66.** The IR spectrum of compound **9\***.

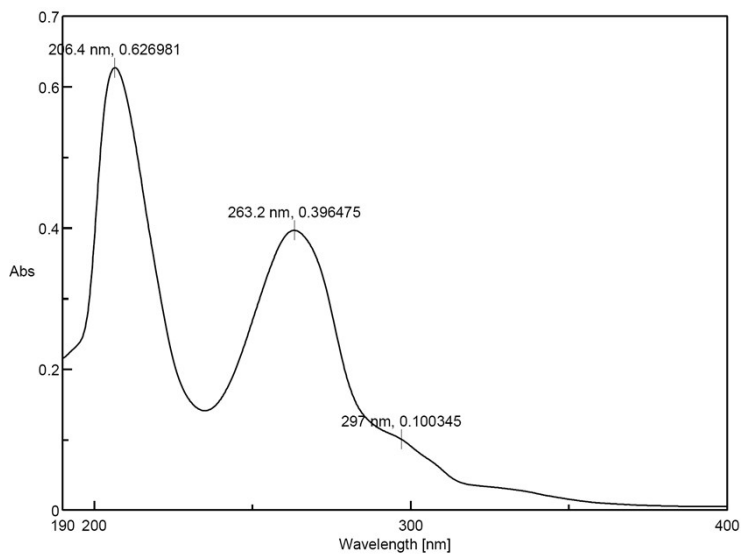

**Figure S67.** The UV spectrum of compound **9\***

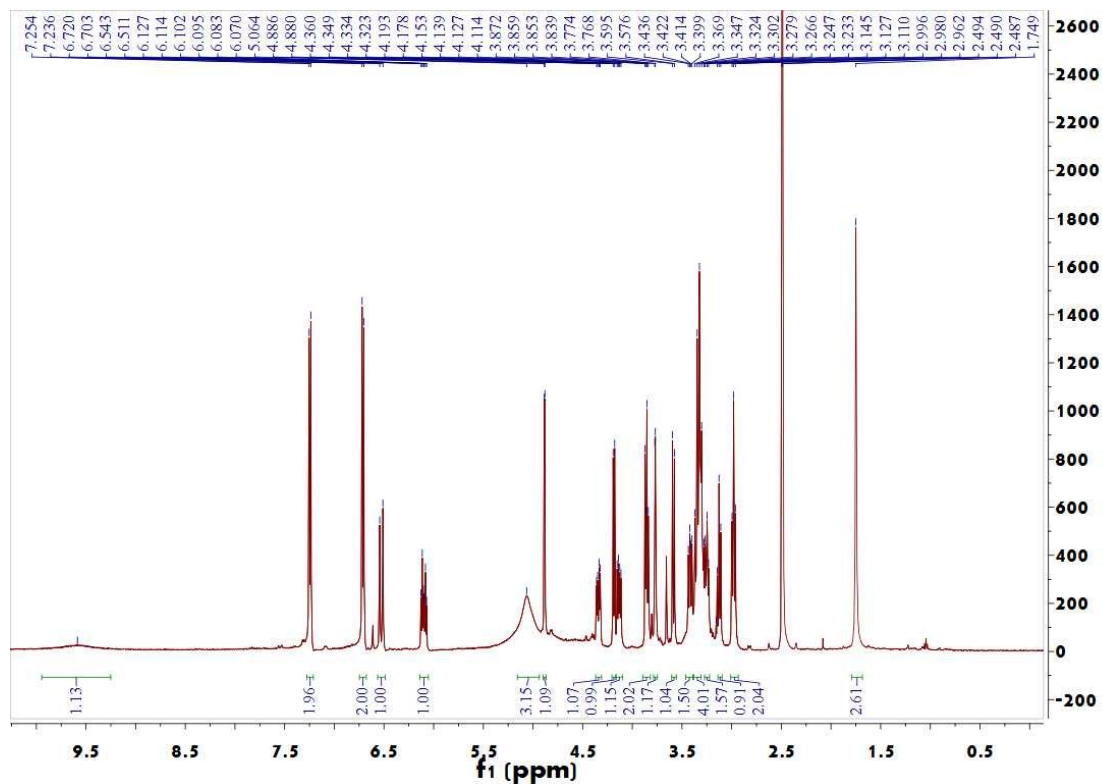

Figure S68. The  $^1\text{H}$  NMR spectrum of compound **9\*** in  $\text{DMSO-}d_6$ .

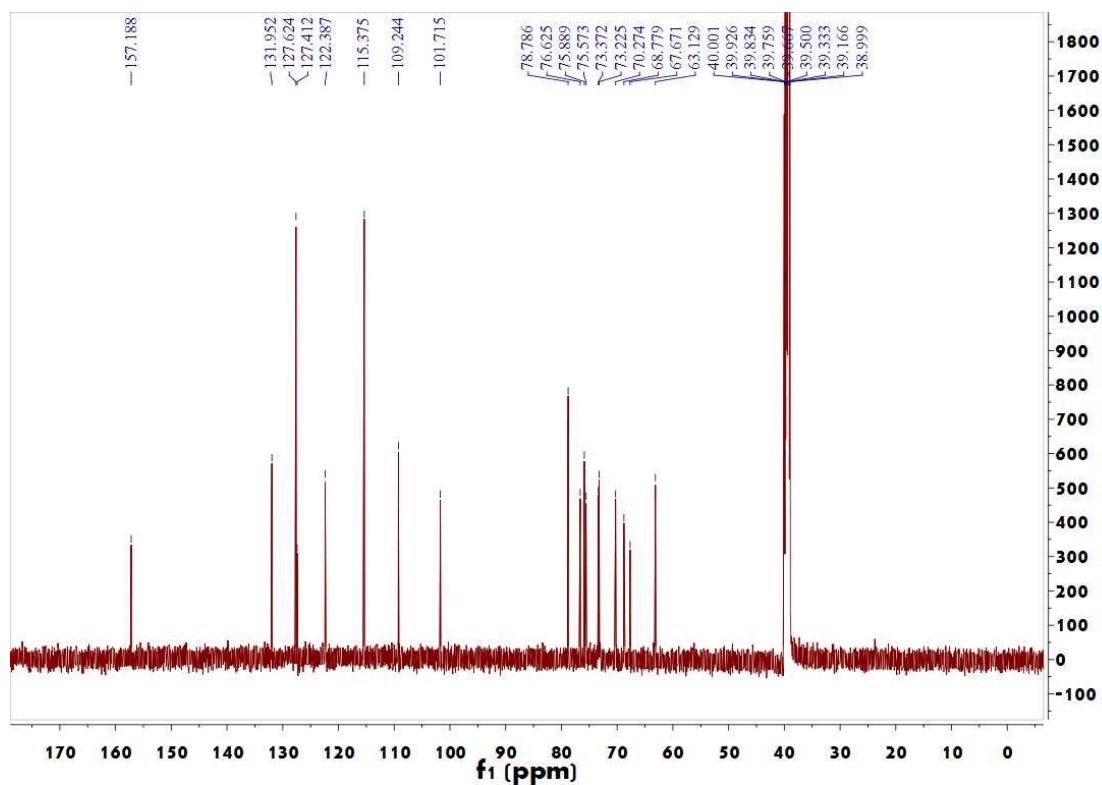

Figure S69. The  $^{13}\text{C}$  NMR spectrum of compound **9\*** in  $\text{DMSO-}d_6$ .

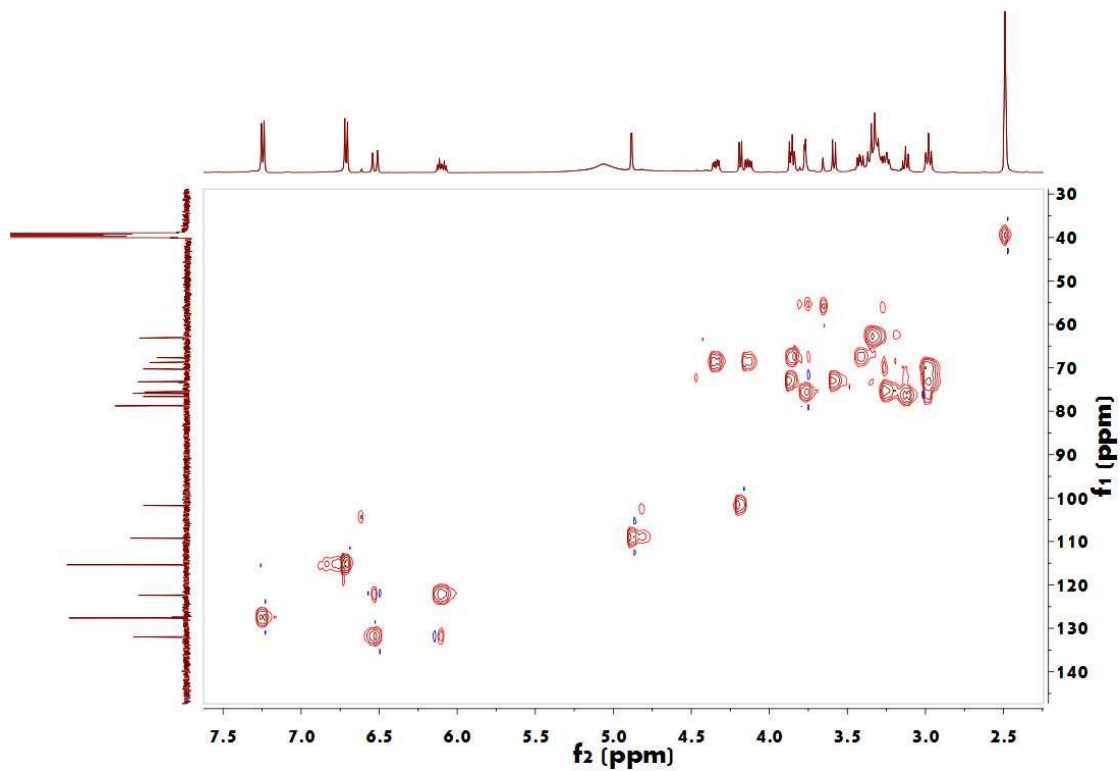

Figure S70. The HSQC spectrum of compound **9\*** in DMSO- $d_6$

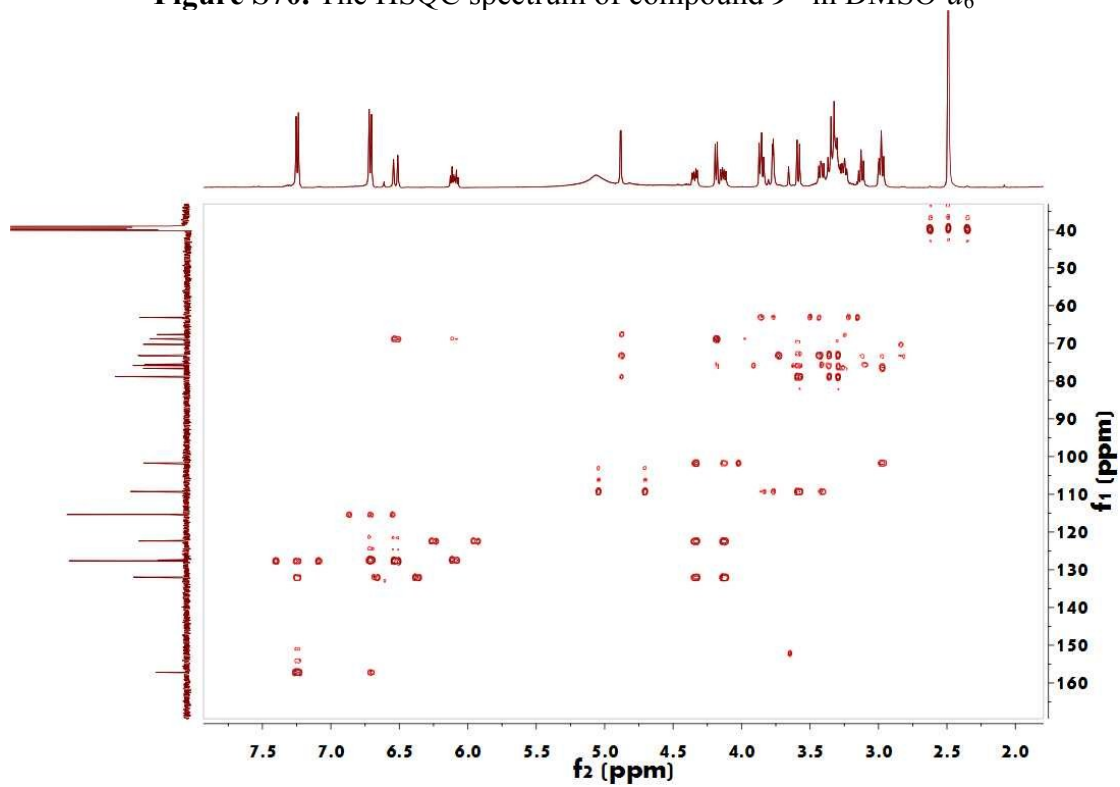

Figure S71. The HMBC spectrum of compound **9\*** in DMSO- $d_6$ .



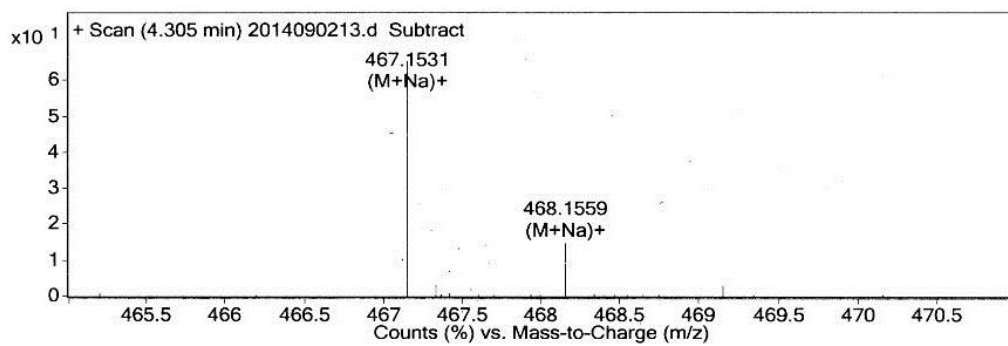

**Figure S72.** The HRESIMS of compound **9\***
